# Supplementary material for: Tunable bandgaps in self-assembled transition metal-incorporated heterometallic M2Sb4 (M = V, Mn, Co, Ni, and Cu) oxo clusters
Source: Royal Society of Chemistry journal article supplement (doi:10.1039/d3dt01000g), 2023-01-01
Supplement: d3dt01000g1.pdf [file d3dt01000g1.pdf]

## Tunable bandgap in self-assembled transition metal-incorporated heterometallic $M_2Sb_4$ ( $M = V, Mn, Co, Ni, \text{ and } Cu$ ) oxo clusters

Tokala Navaneetha,<sup>‡, a</sup> Uppara Ugandhar,<sup>‡, a</sup> Calvin Samuel,<sup>a</sup> Thierry Guizouarn,<sup>b</sup> Fabrice Pointillart,<sup>b</sup> Rajamani Raghunathan\*,<sup>c</sup> and Viswanathan Baskar\*,<sup>a</sup>

<sup>a</sup>School of Chemistry, University of Hyderabad, Hyderabad-500046, Telangana, India.

<sup>b</sup>Univ Rennes, CNRS, ISCR (Institut des Sciences Chimiques de Rennes), UMR 6226, 35000 Rennes, France.

<sup>c</sup>UGC-DAE Consortium for Scientific Research, DAVV Campus, Indore 452001, India.

### Contents:

1. **Table S1:** crystallographic information of compounds **1-5**.
2. **Table S2:** Selected bond lengths (Å) and bond angles (deg) parameters of compound **1**.
3. **Table S3:** EDAX analysis of **1**.
4. **Table S4:** Selected bond lengths (Å) and bond angles (deg) parameters of compound **2**.
5. **Table S5:** EDAX analysis of **2**.
6. **Table S6:** Selected bond lengths (Å) and bond angles (deg) parameters of compound **3**.
7. **Table S7:** EDAX analysis of **3**.
8. **Table S8:** Selected bond lengths (Å) and bond angles (deg) parameters of compound **4**.
9. **Table S9:** EDAX analysis of **4**.
10. **Table S10:** Selected bond lengths (Å) and bond angles (deg) parameters of compound **5**.
11. **Table S11:** EDAX analysis of **5**.
12. **Table S12:** Shape calculation of compounds **1-5**.
13. **Table S13:** Bond Valence Sum (BVS) calculations.
14. **Figure S1:** ORTEP view of **1**.
15. **Figure S2:** IR spectrum of compound **1**.
16. **Figure S3:** Powder XRD spectrum of compound **1**.
17. **Figure S4:** EDAX spectrum of compound **1**.
18. **Figure S5:** Elemental mapping of compound **1**.
19. **Figure S6:** Solid-state UV-vis absorption spectrum of compound **1**.
20. **Figure S7:** Tauc plot of compound **1**.
21. **Figure S8:** ORTEP view of **2**.
22. **Figure S9:** IR spectrum of compound **2**.
23. **Figure S10:** Powder XRD spectrum of compound **2**.
24. **Figure S11:** EDAX spectrum of compound **2**.
25. **Figure S12:** Elemental mapping of compound **2**.

26. **Figure S13:** Solid-state UV-vis absorption spectrum of compound **2**.
27. **Figure S14:** Tauc plot of compound **2**.
28. **Figure S15:** ORTEP view of **3**.
29. **Figure S16:** IR spectrum of compound **3**.
30. **Figure S17:** Powder XRD spectrum of compound **3**.
31. **Figure S18:** EDAX spectrum of compound **3**.
32. **Figure S19:** Elemental mapping of compound **3**.
33. **Figure S20:** Solid-state UV-vis absorption spectrum of compound **3**.
34. **Figure S21:** Tauc plot of compound **3**.
35. **Figure S22:** ORTEP view of **4**.
36. **Figure S23:** IR spectrum of compound **4**.
37. **Figure S24:** Powder XRD spectrum of compound **4**.
38. **Figure S25:** EDAX spectrum of compound **4**.
39. **Figure S26:** Elemental mapping of compound **4**.
40. **Figure S27:** Solid-state UV-vis absorption spectrum of compound **4**.
41. **Figure S28:** Tauc plot of compound **4**.
42. **Figure S29:** ORTEP view of **5**.
43. **Figure S30:** IR spectrum of compound **5**.
44. **Figure S31:** Powder XRD spectrum of compound **5**.
45. **Figure S32:** EDAX spectrum of compound **5**.
46. **Figure S33:** Elemental mapping of compound **5**.
47. **Figure S34:** Solid-state UV-vis absorption spectrum of compound **5**.
48. **Figure S35:** Tauc plot of compound **5**.
49. **Figure S36:** Tauc plots of compounds **1-5** (combined spectra).
50. **Figure S37:** Packing diagram of compound **1**.
51. **Figure S38:** Packing diagram of compound **2**.
52. **Figure S39:** Packing diagram of compound **3**.
53. **Figure S40:** Packing diagram of compound **4**.
54. **Figure S41:** Packing diagram of compound **5**.

**Table S1:** crystallographic information of compounds **1-5**.

|                                                | <b>1</b>                                                                                                      | <b>2</b>                                                                                                       | <b>3</b>                                                                                                       |
|------------------------------------------------|---------------------------------------------------------------------------------------------------------------|----------------------------------------------------------------------------------------------------------------|----------------------------------------------------------------------------------------------------------------|
| Formula                                        | C <sub>44</sub> H <sub>64</sub> Cl <sub>4</sub> O <sub>22</sub> P <sub>4</sub> Sb <sub>4</sub> V <sub>2</sub> | C <sub>68</sub> H <sub>110</sub> Mn <sub>2</sub> N <sub>2</sub> O <sub>22</sub> P <sub>4</sub> Sb <sub>4</sub> | C <sub>67</sub> Co <sub>2</sub> H <sub>106</sub> N <sub>2</sub> O <sub>21</sub> P <sub>4</sub> Sb <sub>4</sub> |
| Formula weight                                 | 1799.51                                                                                                       | 2028.33                                                                                                        | 2004.27                                                                                                        |
| Temperature/K                                  | 109(3)                                                                                                        | 100(2)                                                                                                         | 100(2)                                                                                                         |
| Crystal system                                 | monoclinic                                                                                                    | monoclinic                                                                                                     | monoclinic                                                                                                     |
| Space group                                    | <i>P2<sub>1</sub>/n</i>                                                                                       | <i>C2/c</i>                                                                                                    | <i>C2/c</i>                                                                                                    |
| a/Å                                            | 9.9319(2)                                                                                                     | 25.252(3)                                                                                                      | 25.233(8)                                                                                                      |
| b/Å                                            | 24.0942(5)                                                                                                    | 20.379(3)                                                                                                      | 20.100(8)                                                                                                      |
| c/Å                                            | 13.5380(2)                                                                                                    | 16.0757(18)                                                                                                    | 16.085(6)                                                                                                      |
| α/°                                            | 90                                                                                                            | 90                                                                                                             | 90                                                                                                             |
| β/°                                            | 99.005(2)                                                                                                     | 91.123(2)                                                                                                      | 91.279(10)                                                                                                     |
| γ/°                                            | 90                                                                                                            | 90                                                                                                             | 90                                                                                                             |
| Volume/Å <sup>3</sup>                          | 3199.73(11)                                                                                                   | 8271.1(16)                                                                                                     | 8156(5)                                                                                                        |
| Z                                              | 2                                                                                                             | 4                                                                                                              | 4                                                                                                              |
| ρ <sub>calc</sub> /g/cm <sup>3</sup>           | 1.868                                                                                                         | 1.629                                                                                                          | 1.632                                                                                                          |
| μ/mm <sup>-1</sup>                             | 2.281                                                                                                         | 1.730                                                                                                          | 1.849                                                                                                          |
| F(000)                                         | 1764.0                                                                                                        | 4088.0                                                                                                         | 4032.0                                                                                                         |
| Crystal size/mm <sup>3</sup>                   | 0.23 × 0.19 × 0.14                                                                                            | 0.16 × 0.14 × 0.13                                                                                             | 0.23 × 0.17 × 0.13                                                                                             |
| Radiation                                      | MoKα (λ = 0.71073)                                                                                            | MoKα (λ = 0.71073)                                                                                             | MoKα (λ = 0.71073)                                                                                             |
| 2θ range (°)                                   | 4.484 to 50.698                                                                                               | 2.568 to 52.838                                                                                                | 2.59 to 53.728                                                                                                 |
| Index ranges                                   | -11 ≤ h ≤ 11,<br>-29 ≤ k ≤ 28,<br>-16 ≤ l ≤ 15                                                                | -31 ≤ h ≤ 31,<br>-25 ≤ k ≤ 25,<br>-20 ≤ l ≤ 20                                                                 | -31 ≤ h ≤ 31,<br>-25 ≤ k ≤ 25,<br>-20 ≤ l ≤ 20                                                                 |
| Reflections collected                          | 29157                                                                                                         | 43796                                                                                                          | 43123                                                                                                          |
| Independent reflections                        | 5855                                                                                                          | 8474                                                                                                           | 8521                                                                                                           |
| Goodness-of-fit on F <sup>2</sup>              | 1.089                                                                                                         | 1.114                                                                                                          | 1.021                                                                                                          |
| R <sub>1</sub> (F) (I > 2σ(I))                 | 0.0351                                                                                                        | 0.0356                                                                                                         | 0.0471                                                                                                         |
| wR <sub>2</sub> (F <sup>2</sup> ) (all data)   | 0.0908                                                                                                        | 0.0837                                                                                                         | 0.1058                                                                                                         |
| Largest diff. peak/hole / e<br>Å <sup>-3</sup> | 0.92/-0.87                                                                                                    | 1.17/-0.61                                                                                                     | 1.11/-0.69                                                                                                     |
| completeness to θ <sub>max</sub> , %           | 100.0                                                                                                         | 99.5                                                                                                           | 96.8                                                                                                           |

|                                                          | 4                                                                                                              | 5                                                                                                              |
|----------------------------------------------------------|----------------------------------------------------------------------------------------------------------------|----------------------------------------------------------------------------------------------------------------|
| Formula                                                  | C <sub>68</sub> H <sub>110</sub> N <sub>2</sub> Ni <sub>2</sub> O <sub>22</sub> P <sub>4</sub> Sb <sub>4</sub> | C <sub>68</sub> H <sub>110</sub> Cu <sub>2</sub> N <sub>2</sub> O <sub>22</sub> P <sub>4</sub> Sb <sub>4</sub> |
| Formula weight                                           | 2035.87                                                                                                        | 2045.53                                                                                                        |
| Temperature/K                                            | 100(2)                                                                                                         | 100(2)                                                                                                         |
| Crystal system                                           | monoclinic                                                                                                     | triclinic                                                                                                      |
| Space group                                              | <i>C2/c</i>                                                                                                    | <i>P-1</i>                                                                                                     |
| <i>a</i> /Å                                              | 25.249(3)                                                                                                      | 12.8207(14)                                                                                                    |
| <i>b</i> /Å                                              | 20.009(3)                                                                                                      | 13.3637(15)                                                                                                    |
| <i>c</i> /Å                                              | 16.163(2)                                                                                                      | 13.7013(15)                                                                                                    |
| $\alpha$ /°                                              | 90                                                                                                             | 99.588(2)                                                                                                      |
| $\beta$ /°                                               | 91.427(2)                                                                                                      | 93.106(2)                                                                                                      |
| $\gamma$ /°                                              | 90                                                                                                             | 114.547(2)                                                                                                     |
| Volume/Å <sup>3</sup>                                    | 8163.4(18)                                                                                                     | 2085.5(4)                                                                                                      |
| <i>Z</i>                                                 | 4                                                                                                              | 1                                                                                                              |
| $\rho_{\text{calc}}/\text{cm}^3$                         | 1.657                                                                                                          | 1.629                                                                                                          |
| $\mu/\text{mm}^{-1}$                                     | 1.904                                                                                                          | 1.922                                                                                                          |
| F(000)                                                   | 4112.0                                                                                                         | 1030.0                                                                                                         |
| Crystal size/mm <sup>3</sup>                             | 0.16 × 0.14 × 0.12                                                                                             | 0.23 × 0.18 × 0.16                                                                                             |
| Radiation                                                | MoK $\alpha$ ( $\lambda = 0.71073$ )                                                                           | MoK $\alpha$ ( $\lambda = 0.71073$ )                                                                           |
| 2 $\theta$ range (°)                                     | 2.598 to 52.776                                                                                                | 3.044 to 52.866                                                                                                |
| Index ranges                                             | -31 ≤ <i>h</i> ≤ 31,<br>-24 ≤ <i>k</i> ≤ 24,<br>-20 ≤ <i>l</i> ≤ 20                                            | -15 ≤ <i>h</i> ≤ 16,<br>-16 ≤ <i>k</i> ≤ 16,<br>-17 ≤ <i>l</i> ≤ 16                                            |
| Reflections collected                                    | 43172                                                                                                          | 16745                                                                                                          |
| Independent reflections                                  | 8334                                                                                                           | 8416                                                                                                           |
| Goodness-of-fit on F <sup>2</sup>                        | 1.081                                                                                                          | 1.027                                                                                                          |
| R <sub>1</sub> (F) ( <i>I</i> > 2 $\sigma$ ( <i>I</i> )) | 0.0365                                                                                                         | 0.0311                                                                                                         |
| wR <sub>2</sub> (F <sup>2</sup> ) (all data)             | 0.0873                                                                                                         | 0.0757                                                                                                         |
| Largest diff. peak/hole / e Å <sup>-3</sup>              | 1.14/-0.64                                                                                                     | 0.84/-0.52                                                                                                     |
| completeness to $\theta_{\text{max}}$ , %                | 99.7                                                                                                           | 98.2                                                                                                           |

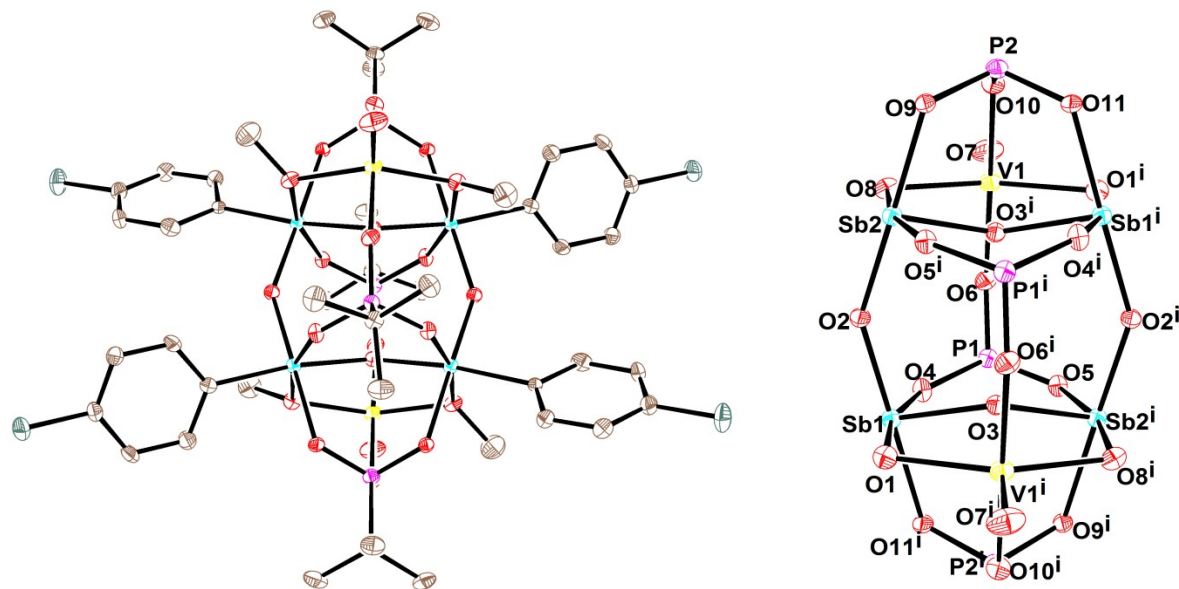

**Figure S1:** ORTEP view of **1** with thermal ellipsoids shown at 30% probability.

**Table S2:** Selected bond lengths (Å) and bond angles (deg) parameters of compound **1**.

|                      |          |                         |            |                                      |            |
|----------------------|----------|-------------------------|------------|--------------------------------------|------------|
| Sb1-O4               | 2.005(3) | O3-Sb1-O11 <sup>1</sup> | 86.59(11)  | O6-V1-O1 <sup>1</sup>                | 93.74(11)  |
| Sb1-O3               | 1.967(3) | O3-Sb1-O1               | 76.46(11)  | O7-V1-O3 <sup>1</sup>                | 178.88(13) |
| Sb1-O2               | 1.921(3) | O2-Sb1-O4               | 92.25(11)  | O7-V1-O8                             | 109.20(15) |
| Sb1-O11 <sup>1</sup> | 2.052(3) | O2-Sb1-O3               | 94.59(11)  | O7-V1-O10                            | 93.31(14)  |
| Sb1-O1               | 2.048(3) | O2-Sb1-O11 <sup>1</sup> | 177.78(11) | O7-V1-O1 <sup>1</sup>                | 108.97(15) |
| Sb2-O3 <sup>1</sup>  | 1.965(3) | O1-Sb1-O11 <sup>1</sup> | 88.20(11)  | O7-V1-O6                             | 92.61(14)  |
| Sb2-O8               | 2.047(3) | O31-Sb2-O8              | 77.12(11)  | O4-P1-O5                             | 111.24(16) |
| Sb2-O9               | 2.060(3) | O31-Sb2-O9              | 86.38(10)  | O6-P1-O4                             | 112.36(16) |
| Sb2-O2               | 1.927(3) | O31-Sb2-O5 <sup>1</sup> | 90.11(11)  | O6-P1-O5                             | 111.89(16) |
| Sb2-O5 <sup>1</sup>  | 2.004(3) | O8-Sb2-O9               | 87.73(11)  | O11-P2-O9                            | 109.51(16) |
| V1-O3 <sup>1</sup>   | 2.230(3) | O2-Sb2-O3 <sup>1</sup>  | 94.17(11)  | O10-P2-O9                            | 110.98(16) |
| V1-O8                | 2.051(3) | O2-Sb2-O8               | 91.46(11)  | O10-P2-O11                           | 110.59(16) |
| V1-O10               | 2.000(3) | O2-Sb2-O9               | 178.89(10) | P1-O4-Sb1                            | 136.01(16) |
| V1-O11               | 2.065(3) | O2-Sb2-O5 <sup>1</sup>  | 93.72(11)  | Sb1-O3-V11                           | 103.55(12) |
| V1-O6                | 1.987(3) | O51-Sb2-O8              | 166.54(11) | Sb2 <sup>1</sup> -O3-Sb1             | 138.61(14) |
| V1-O7                | 1.602(3) | O51-Sb2-O9              | 87.24(11)  | Sb2 <sup>1</sup> -O3-V1 <sup>1</sup> | 102.89(10) |
| P1-O4                | 1.542(3) | O8-V1-O3 <sup>1</sup>   | 71.37(10)  | Sb2-O8-V1                            | 106.52(12) |
| P1-O5                | 1.543(3) | O8-V1-O1 <sup>1</sup>   | 141.02(11) | P2-O9-Sb2                            | 122.87(15) |

|                         |            |                                     |            |                         |            |
|-------------------------|------------|-------------------------------------|------------|-------------------------|------------|
| P1-O6                   | 1.490(3)   | O10-V1-O3 <sup>1</sup>              | 87.69(10)  | Sb1-O2-Sb2              | 146.09(15) |
| P2-O9                   | 1.554(3)   | O10-V1-O8                           | 84.97(11)  | P2-O11-Sb1 <sup>1</sup> | 123.16(16) |
| P2-O11                  | 1.548(3)   | O10-V1-O1 <sup>1</sup>              | 85.30(11)  | P1-O5-Sb2 <sup>1</sup>  | 137.08(17) |
| P2-O10                  | 1.510(3)   | O1 <sup>1</sup> -V1-O3 <sup>1</sup> | 70.60(10)  | P2-O10-V1               | 123.13(16) |
| O4-Sb1-O11 <sup>1</sup> | 85.85(11)  | O6-V1-O3 <sup>1</sup>               | 86.40(11)  | Sb1-O1-V1 <sup>1</sup>  | 106.77(13) |
| O4-Sb1-O1               | 166.00(11) | O6-V1-O8                            | 92.12(12)  | P1-O6-V1                | 153.53(18) |
| O3-Sb1-O4               | 90.54(11)  | O6-V1-O10                           | 173.99(12) |                         |            |

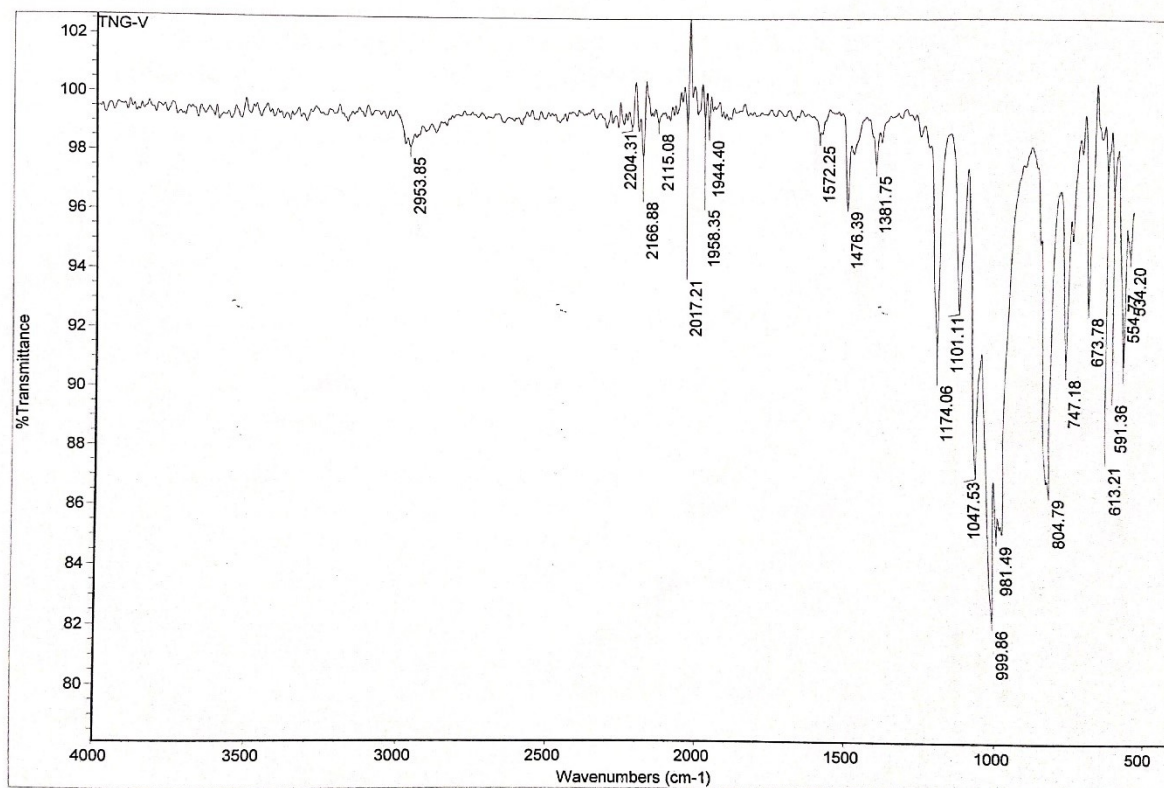

**Figure S2:** IR spectrum of compound **1**.

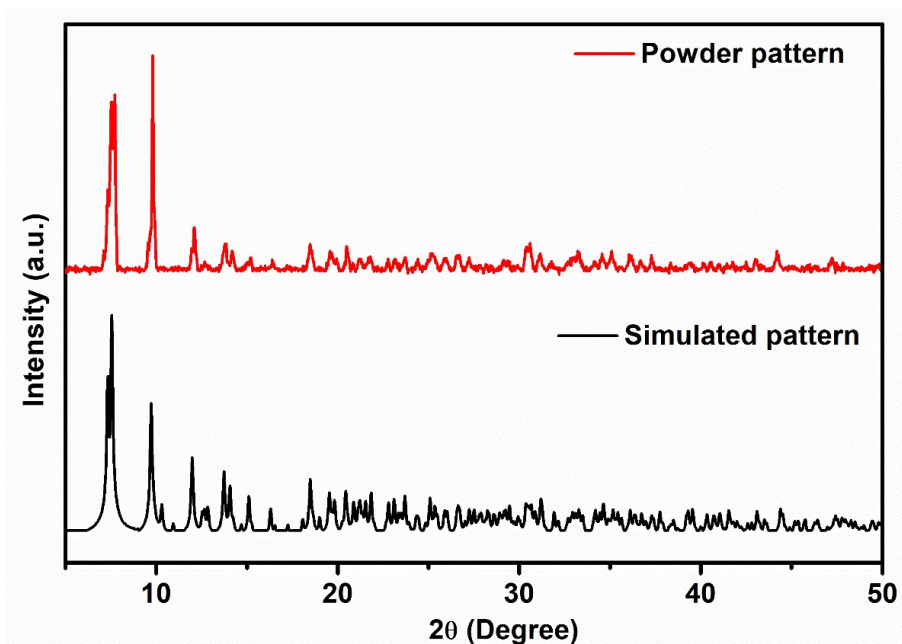

**Figure S3:** Powder X-ray diffraction pattern of a bulk sample of **1** compared to the simulated powder pattern extracted from single-crystal diffraction data.

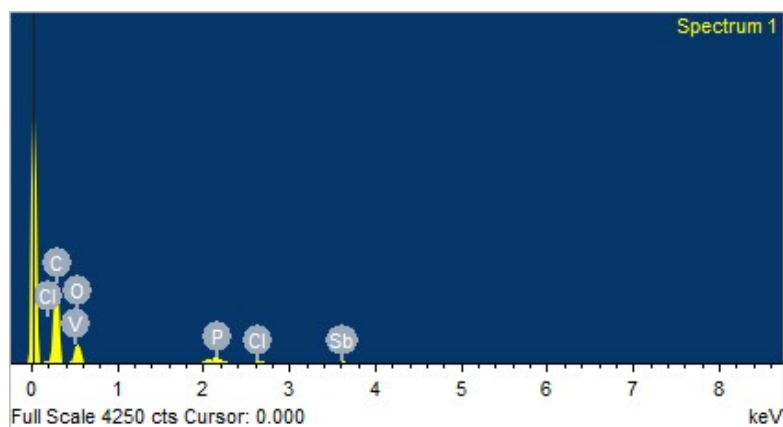

Quantitative results

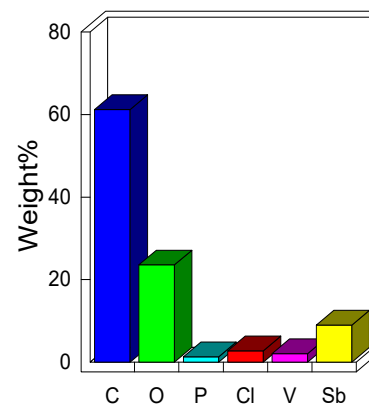

**Figure S4:** EDAX spectrum of compound **1**.

**Table S3:** EDAX analysis of **1**.

| Element | Calculated weight% | Measured weight% from EDAX analysis |
|---------|--------------------|-------------------------------------|
| C       | 29.37              | 28.87                               |
| Cl      | 7.88               | 7.33                                |
| O       | 19.56              | 21.75                               |
| P       | 6.88               | 5.68                                |
| V       | 5.66               | 4.82                                |
| Sb      | 27.06              | 31.55                               |
| H       | 3.58               | Not detected                        |



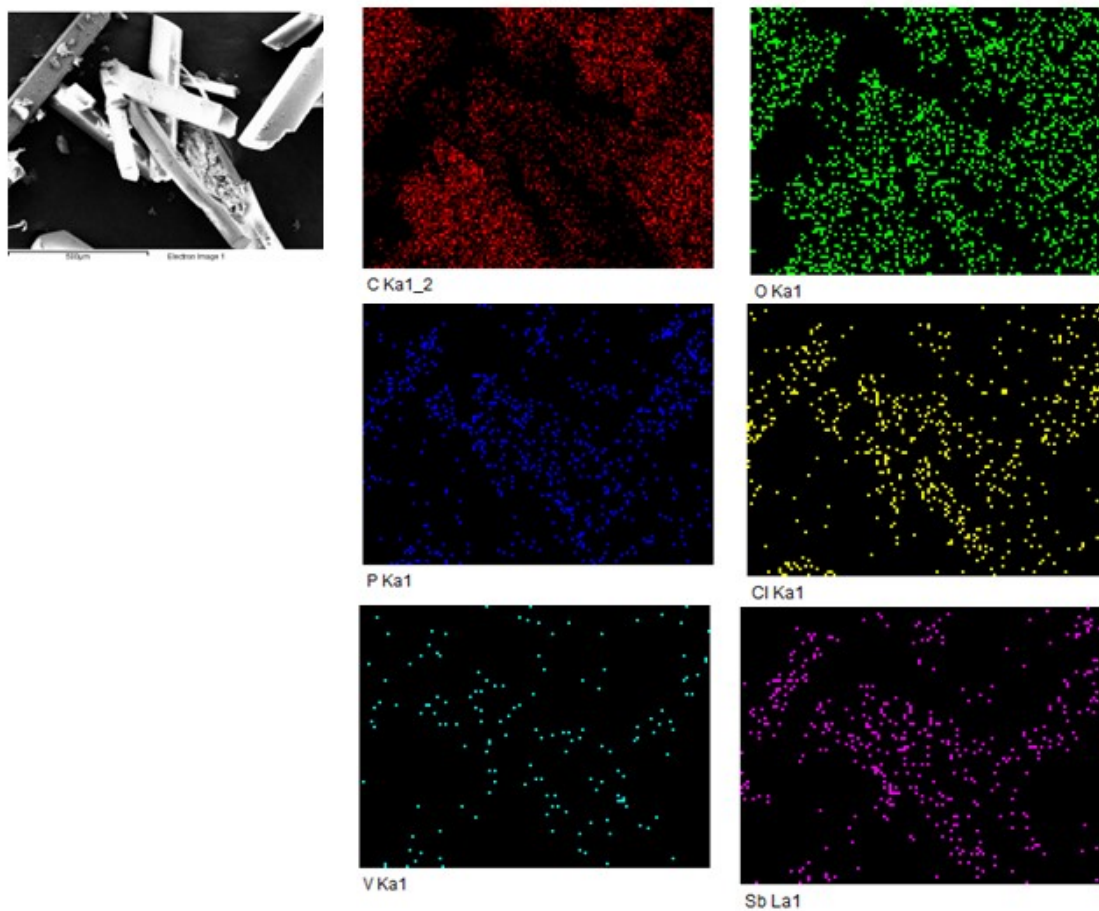

**Figure S5:** Elemental mapping of compound 1.

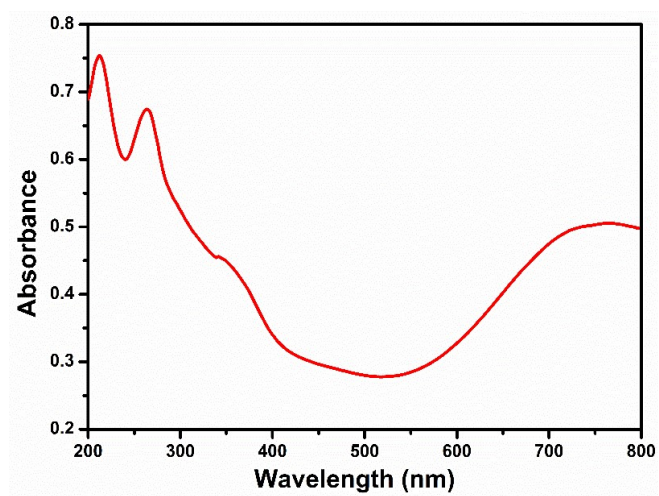

**Figure S6:** Solid-state UV-vis absorption spectrum of compound 1.

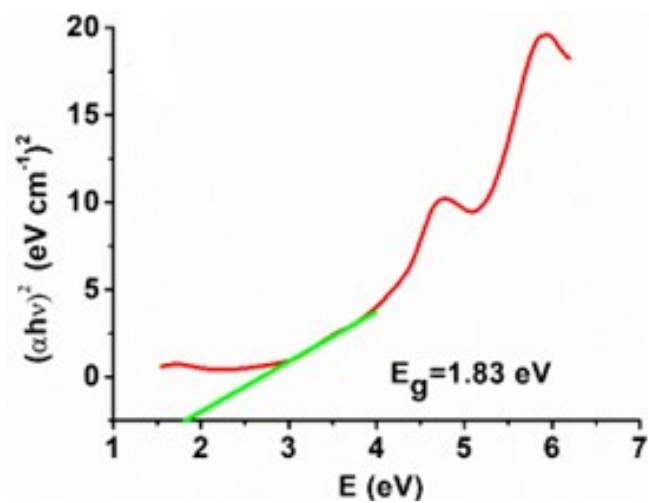

(a) Direct bandgap

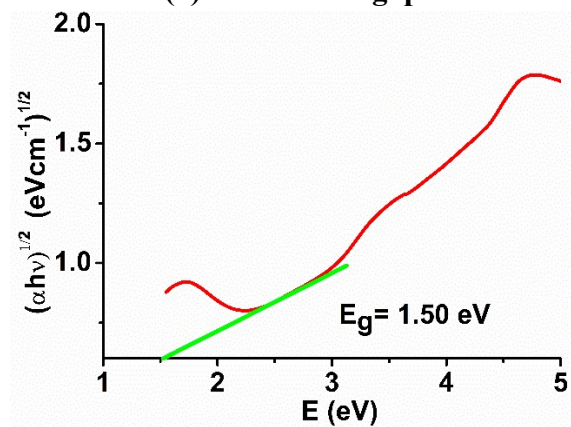

(b) Indirect bandgap

Figure S7: Tauc plot of compound 1.

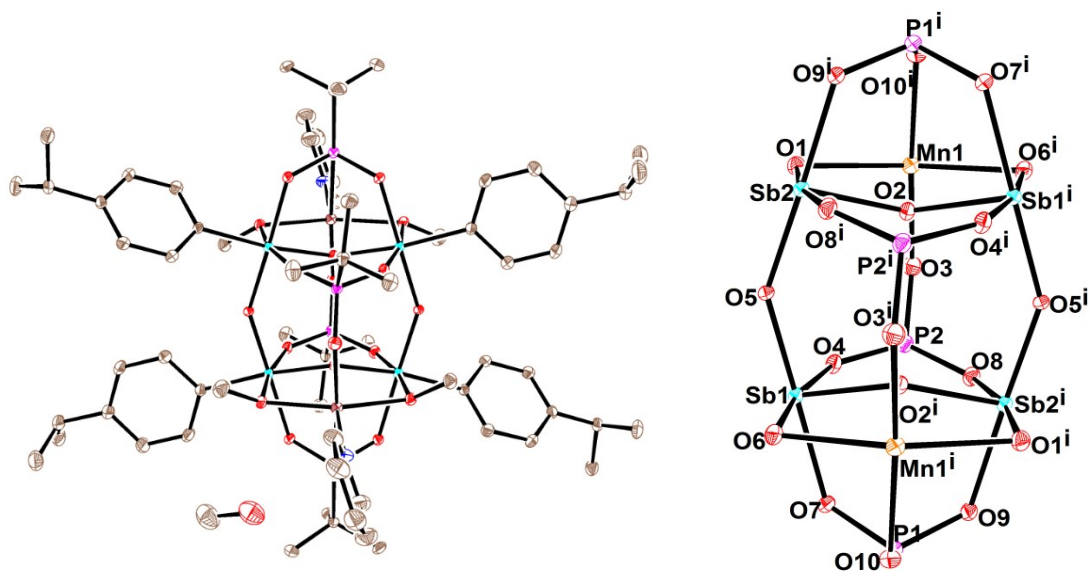

**Figure S8:** ORTEP view of **2** with thermal ellipsoids shown at 30% probability.

**Table S4:** Selected bond lengths (Å) and bond angles (deg) parameters of compound **2**.

|                      |          |                                      |            |                          |            |
|----------------------|----------|--------------------------------------|------------|--------------------------|------------|
| Sb2-O5               | 1.926(2) | O5-Sb2-O9 <sup>1</sup>               | 178.57(9)  | O10 <sup>1</sup> -Mn1-N1 | 88.81(11)  |
| Sb2-O1               | 2.024(2) | O1-Sb2-O9 <sup>1</sup>               | 86.86(10)  | O3-Mn1-O1                | 97.67(10)  |
| Sb2-O8 <sup>1</sup>  | 2.017(2) | O8 <sup>1</sup> -Sb2-O1              | 169.68(10) | O3-Mn1-O6 <sup>1</sup>   | 95.34(9)   |
| Sb2-O2               | 1.962(2) | O8 <sup>1</sup> -Sb2-O9 <sup>1</sup> | 87.70(10)  | O3-Mn1-O2                | 92.07(9)   |
| Sb2-O9 <sup>1</sup>  | 2.053(2) | O2-Sb2-O1                            | 80.63(10)  | O3-Mn1-O10 <sup>1</sup>  | 176.85(10) |
| Sb1-O5               | 1.927(2) | O2-Sb2-O8 <sup>1</sup>               | 90.31(10)  | O3-Mn1-N1                | 90.97(11)  |
| Sb1-O7               | 2.056(2) | O2-Sb2-O9 <sup>1</sup>               | 86.71(9)   | N1-Mn1-O2                | 175.65(11) |
| Sb1-O6               | 2.015(2) | O5-Sb1-O7                            | 178.64(10) | O9-P1-O7                 | 109.16(14) |
| Sb1-O4               | 2.010(2) | O5-Sb1-O6                            | 91.74(10)  | O10-P1-O7                | 112.01(14) |
| Sb1-O2 <sup>1</sup>  | 1.962(2) | O5-Sb1-O4                            | 92.02(10)  | O10-P1-O9                | 112.30(14) |
| Mn1-O1               | 2.204(2) | O5-Sb1-O2 <sup>1</sup>               | 93.90(10)  | O8-P2-O4                 | 110.58(13) |
| Mn1-O6 <sup>1</sup>  | 2.199(2) | O6-Sb1-O7                            | 86.90(10)  | O3-P2-O4                 | 112.80(14) |
| Mn1-O2               | 2.264(2) | O4-Sb1-O7                            | 89.33(10)  | O3-P2-O8                 | 113.10(14) |
| Mn1-O10 <sup>1</sup> | 2.181(3) | O4-Sb1-O6                            | 170.39(9)  | Sb2-O5-Sb1               | 145.94(13) |
| Mn1-O3               | 2.069(3) | O2 <sup>1</sup> -Sb1-O7              | 85.96(9)   | Sb2-O1-Mn1               | 103.44(10) |
| Mn1-N1               | 2.219(3) | O2 <sup>1</sup> -Sb1-O6              | 80.86(10)  | P1-O7-Sb1                | 124.73(14) |
| P1-O7                | 1.558(2) | O2 <sup>1</sup> -Sb1-O4              | 90.06(10)  | Sb1-O6-Mn1 <sup>1</sup>  | 103.87(10) |
| P1-O9                | 1.550(3) | O1-Mn1-O2                            | 70.50(8)   | P2-O4-Sb1                | 138.57(14) |
| P1-O10               | 1.506(3) | O1-Mn1-N1                            | 106.01(12) | P2-O8-Sb2 <sup>1</sup>   | 137.75(14) |
| P2-O4                | 1.554(2) | O6 <sup>1</sup> -Mn1-O1              | 139.26(9)  | Sb2-O2-Sb1 <sup>1</sup>  | 138.73(13) |
| P2-O8                | 1.549(2) | O6 <sup>1</sup> -Mn1-O2              | 70.60(9)   | Sb2-O2-Mn1               | 103.39(9)  |

|                        |           |                                       |            |                         |            |
|------------------------|-----------|---------------------------------------|------------|-------------------------|------------|
| P2-O3                  | 1.497(3)  | O6 <sup>1</sup> -Mn1-N1               | 112.20(12) | Sb11-O2-Mn1             | 103.33(10) |
| O5-Sb2-O1              | 93.21(10) | O10 <sup>1</sup> -Mn1-O1              | 85.41(9)   | P1-O9-Sb2 <sup>1</sup>  | 124.81(14) |
| O5-Sb2-O8 <sup>1</sup> | 92.44(10) | O10 <sup>1</sup> -Mn1-O6 <sup>1</sup> | 81.84(9)   | P1-O10-Mn1 <sup>1</sup> | 116.50(14) |
| O5-Sb2-O2              | 94.72(9)  | O10 <sup>1</sup> -Mn1-O2              | 88.32(9)   | P2-O3-Mn1               | 142.66(16) |

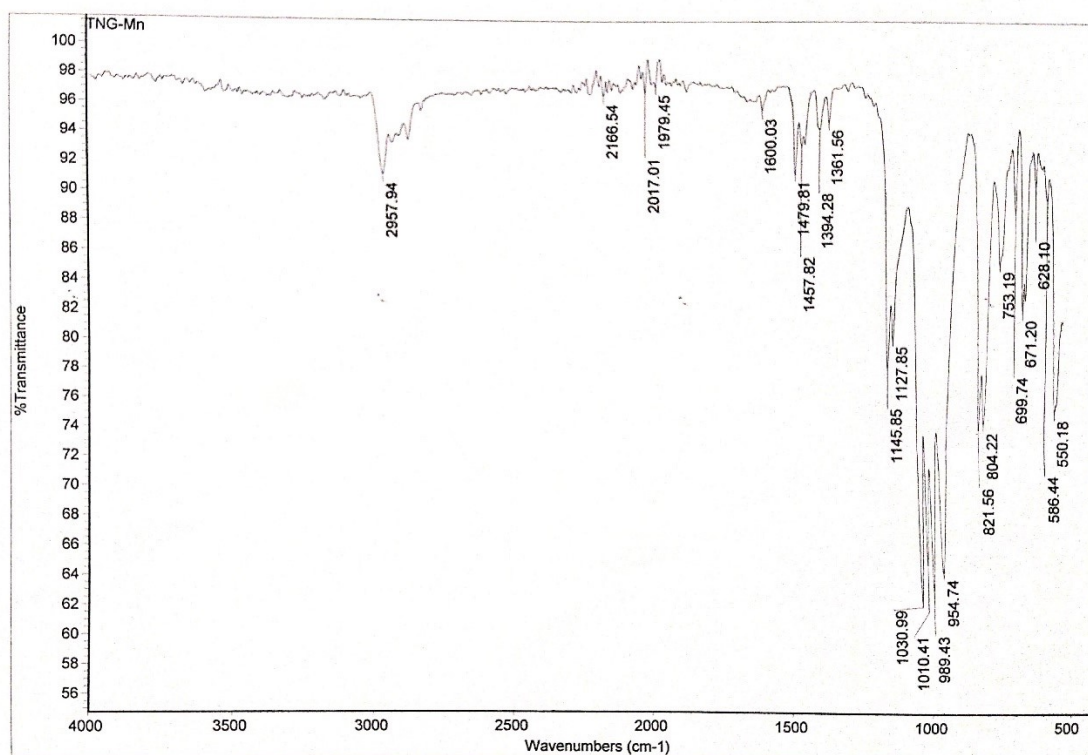

**Figure S9:** IR spectrum of compound 2.

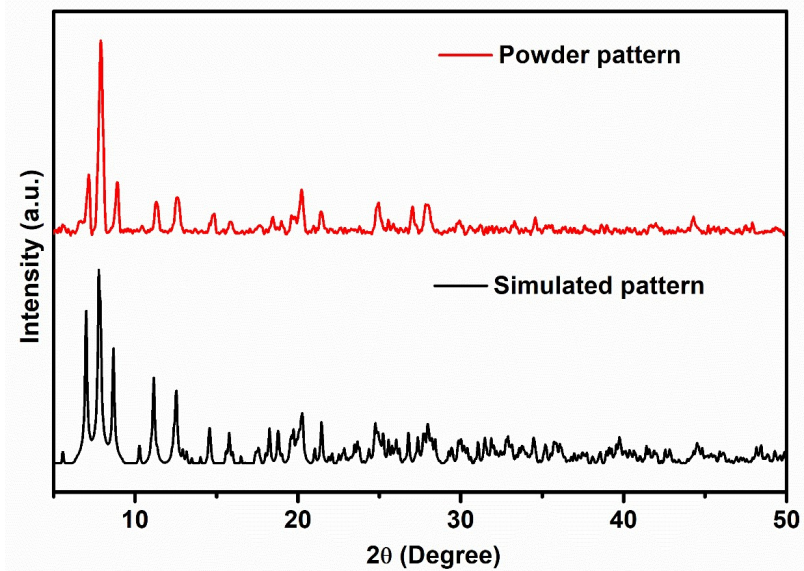

**Figure S10:** Powder X-ray diffraction pattern of a bulk sample of **2**, compared to the simulated powder pattern extracted from single-crystal diffraction data.

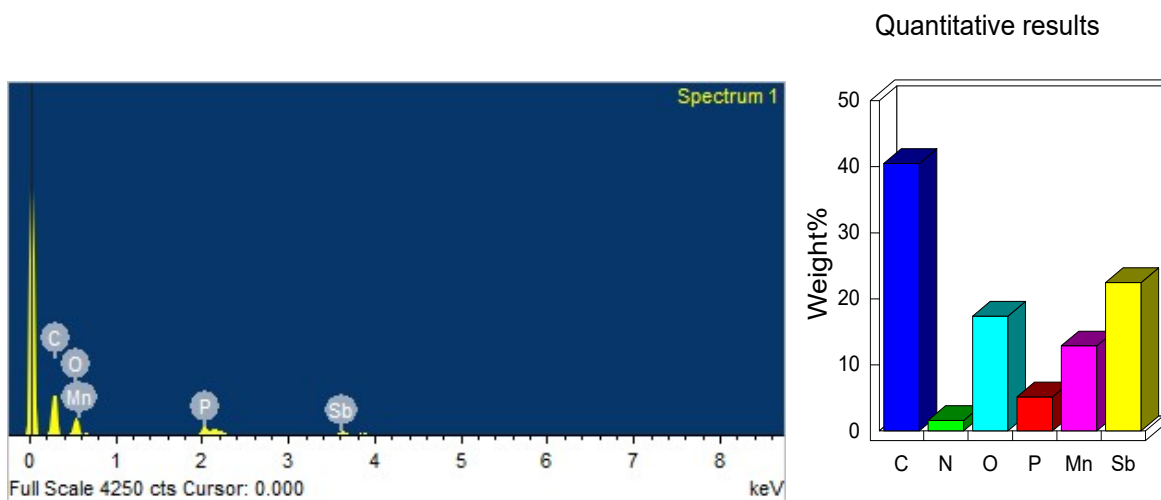

**Figure S11:** EDAX spectrum of compound **2**.

**Table S5:** EDAX analysis of **2**.

| Element | Calculated weight% | Measured weight% from EDAX analysis |
|---------|--------------------|-------------------------------------|
| C       | 40.36              | 40.49                               |
| N       | 1.43               | 1.60                                |
| O       | 16.29              | 17.39                               |
| P       | 6.31               | 7.15                                |
| Mn      | 5.59               | 10.88                               |
| Sb      | 24.79              | 22.49                               |
| H       | 5.23               | Not detected                        |

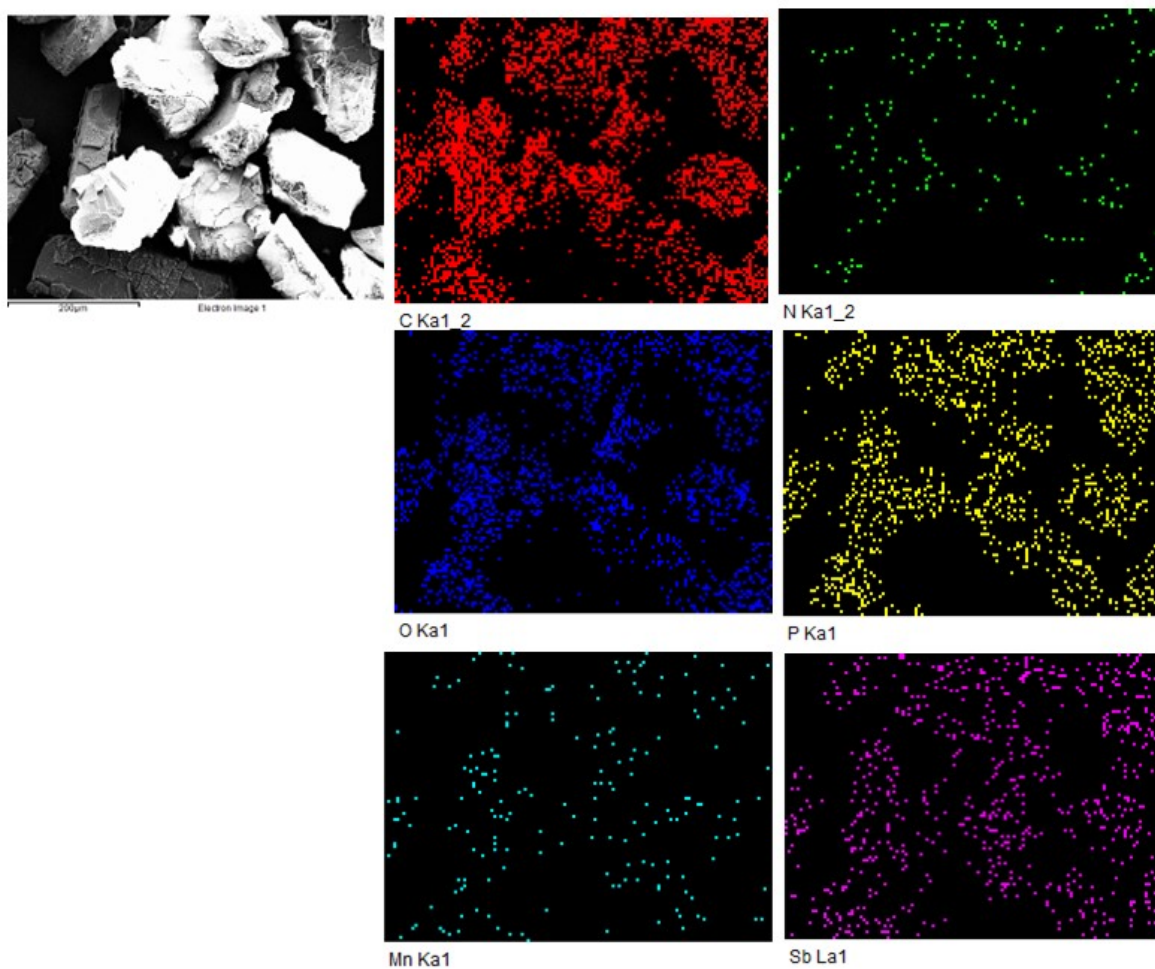

**Figure S12:** Elemental mapping of compound **2**.

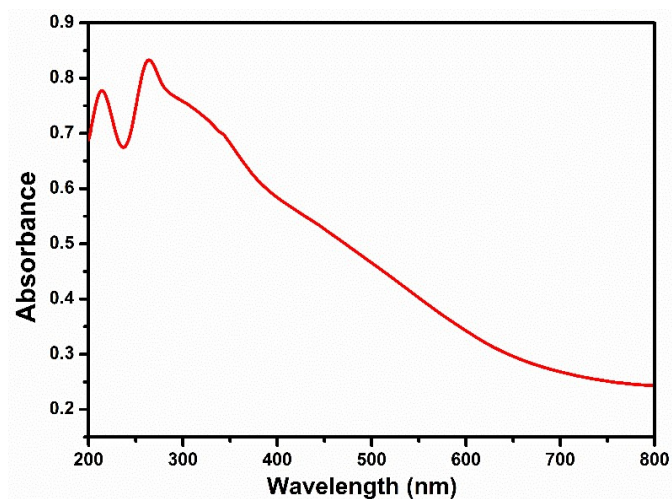

Figure S13: Solid-state UV-vis absorption spectrum of compound 2.

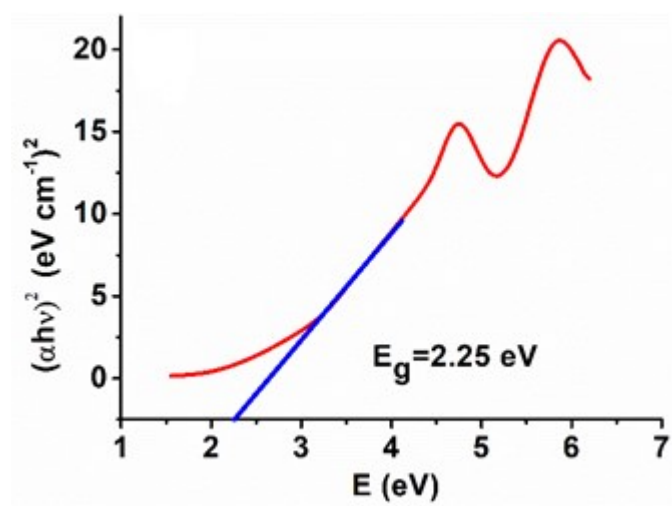

(a) Direct bandgap

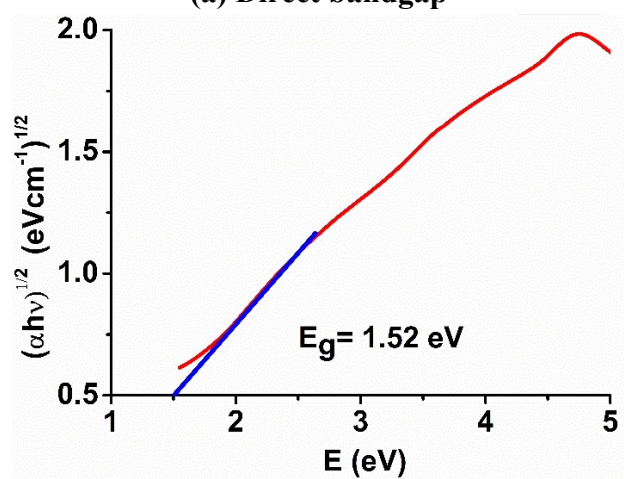

(b) Indirect bandgap

Figure S14: Tauc plot of compound 2.

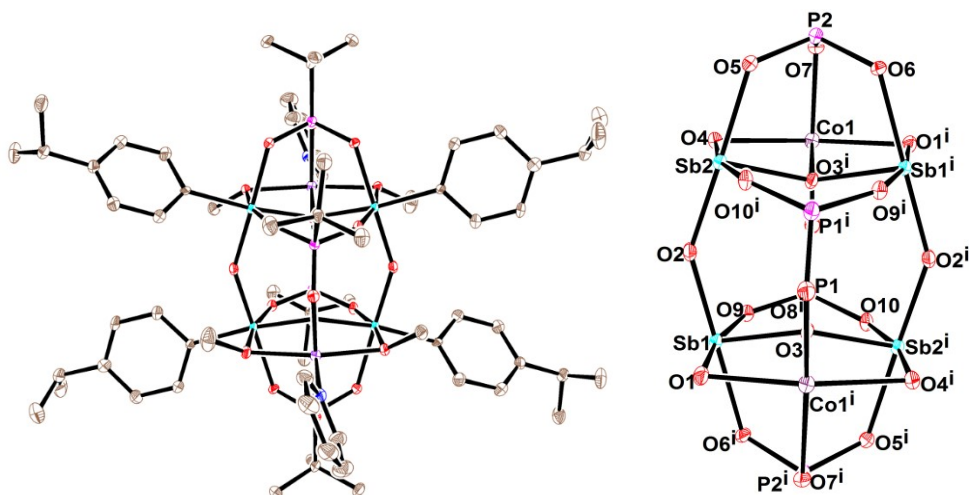

**Figure S15:** ORTEP view of **3** with thermal ellipsoids shown at 30% probability.

**Table S6:** Selected bond lengths (Å) and bond angles (deg) parameters of compound **3**.

|                          |            |                                      |            |                                       |            |
|--------------------------|------------|--------------------------------------|------------|---------------------------------------|------------|
| Sb2-O10 <sup>1</sup>     | 2.017(3)   | O3 <sup>1</sup> -Sb2-O4              | 79.74(13)  | O8-Co1-O4                             | 97.01(13)  |
| Sb2-O3 <sup>1</sup>      | 1.967(3)   | O3 <sup>1</sup> -Sb2-O5              | 86.95(13)  | O8-Co1-O1 <sup>1</sup>                | 94.72(13)  |
| Sb2-O2                   | 1.918(3)   | O2-Sb2-O10 <sup>1</sup>              | 91.66(14)  | O8-Co1-O7                             | 176.28(13) |
| Sb2-O4                   | 2.031(3)   | O2-Sb2-O3 <sup>1</sup>               | 94.88(13)  | O8-Co1-N1                             | 89.32(16)  |
| Sb2-O5                   | 2.050(3)   | O2-Sb2-O4                            | 94.30(14)  | N1-Co1-O3 <sup>1</sup>                | 177.95(14) |
| Sb1-O3                   | 1.960(3)   | O2-Sb2-O5                            | 177.67(14) | N1-Co1-O4                             | 104.32(15) |
| Sb1-O6 <sup>1</sup>      | 2.059(3)   | O4-Sb2-O5                            | 87.43(13)  | N1-Co1-O1 <sup>1</sup>                | 108.30(14) |
| Sb1-O2                   | 1.921(3)   | O3-Sb1-O6 <sup>1</sup>               | 86.08(13)  | O5-P2-O6                              | 109.53(19) |
| Sb1-O1                   | 2.016(3)   | O3-Sb1-O1                            | 79.81(13)  | O7-P2-O6                              | 112.03(19) |
| Sb1-O9                   | 2.007(3)   | O3-Sb1-O9                            | 89.74(13)  | O7-P2-O5                              | 111.99(19) |
| Co1-O3 <sup>1</sup>      | 2.145(3)   | O2-Sb1-O3                            | 94.24(13)  | O9-P1-O10                             | 110.62(19) |
| Co1-O4                   | 2.122(3)   | O2-Sb1-O6 <sup>1</sup>               | 179.51(14) | O8-P1-O10                             | 113.30(19) |
| Co1-O1 <sup>1</sup>      | 2.127(3)   | O2-Sb1-O1                            | 92.91(14)  | O8-P1-O9                              | 112.84(19) |
| Co1-O7                   | 2.088(3)   | O2-Sb1-O9                            | 91.18(14)  | P1-O10-Sb2 <sup>1</sup>               | 137.0(2)   |
| Co1-O8                   | 2.003(3)   | O1-Sb1-O6 <sup>1</sup>               | 87.51(13)  | Sb2 <sup>1</sup> -O3-Co1 <sup>1</sup> | 102.84(13) |
| Co1-N1                   | 2.118(4)   | O9-Sb1-O6 <sup>1</sup>               | 88.45(13)  | Sb1-O3-Sb2 <sup>1</sup>               | 138.87(18) |
| P2-O6                    | 1.550(3)   | O9-Sb1-O1                            | 169.02(12) | Sb1-O3-Co1 <sup>1</sup>               | 103.25(14) |
| P2-O5                    | 1.549(3)   | O4-Co1-O3 <sup>1</sup>               | 73.84(12)  | P2-O6-Sb1 <sup>1</sup>                | 123.50(19) |
| P2-O7                    | 1.501(4)   | O4-Co1-O1 <sup>1</sup>               | 145.36(13) | Sb2-O2-Sb1                            | 145.98(17) |
| P1-O10                   | 1.548(3)   | O1 <sup>1</sup> -Co1-O3 <sup>1</sup> | 73.33(12)  | Sb2-O4-Co1                            | 101.47(14) |
| P1-O9                    | 1.545(3)   | O7-Co1-O3 <sup>1</sup>               | 91.04(13)  | Sb1-O1-Co1 <sup>1</sup>               | 101.95(14) |
| P1-O8                    | 1.500(3)   | O7-Co1-O4                            | 86.10(13)  | P1-O9-Sb1                             | 138.5(2)   |
| O10 <sup>1</sup> -Sb2-O4 | 168.60(13) | O7-Co1-O1 <sup>1</sup>               | 83.78(13)  | P2-O5-Sb2                             | 123.25(19) |
| O10 <sup>1</sup> -Sb2-O5 | 86.90(13)  | O7-Co1-N1                            | 87.93(16)  | P2-O7-Co1                             | 116.45(19) |



|                                       |           |                        |           |           |          |
|---------------------------------------|-----------|------------------------|-----------|-----------|----------|
| O3 <sup>1</sup> -Sb2-O10 <sup>1</sup> | 90.09(13) | O8-Co1-O3 <sup>1</sup> | 91.79(13) | P1-O8-Co1 | 144.3(2) |
|---------------------------------------|-----------|------------------------|-----------|-----------|----------|

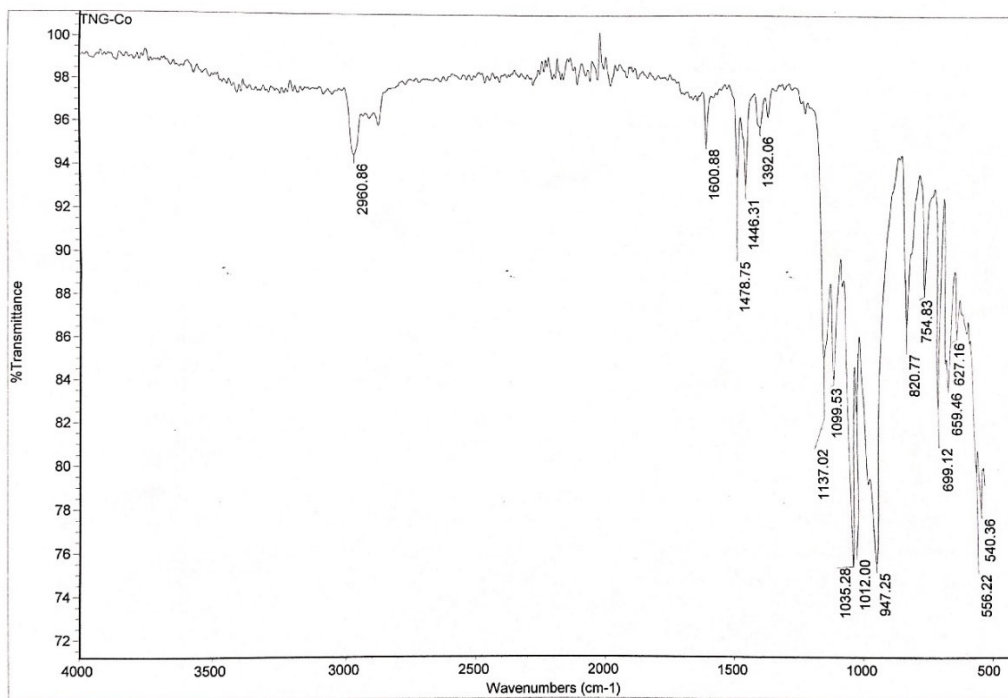

**Figure S16:** IR spectrum of compound 3.

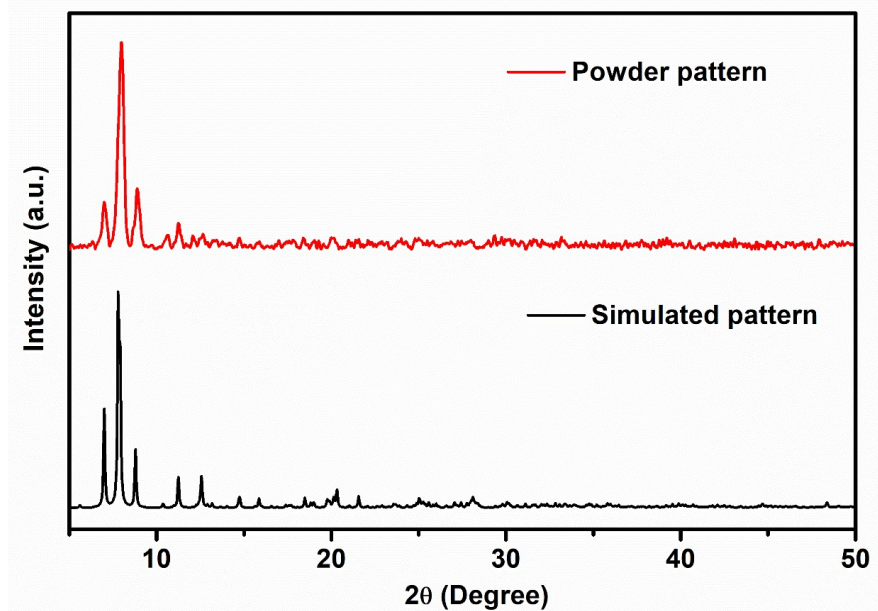

**Figure S17:** Powder X-ray diffraction pattern of a bulk sample of **3** compared to the simulated powder pattern extracted from single-crystal diffraction data.

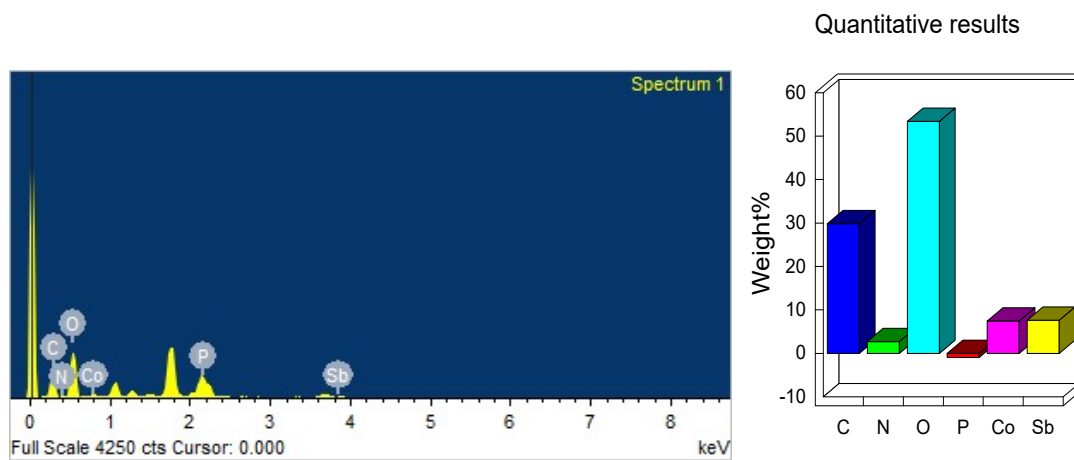

**Figure S18:** EDAX spectrum of compound **3**.

**Table S7:** EDAX analysis of **3**.

| Element | Calculated weight% | Measured weight% from EDAX analysis |
|---------|--------------------|-------------------------------------|
| C       | 40.19              | 41.79                               |
| N       | 1.42               | 2.05                                |
| O       | 16.22              | 18.07                               |
| P       | 6.28               | 6.09                                |
| Co      | 5.98               | 8.11                                |
| Sb      | 24.69              | 23.89                               |
| H       | 5.21               | Not detected                        |

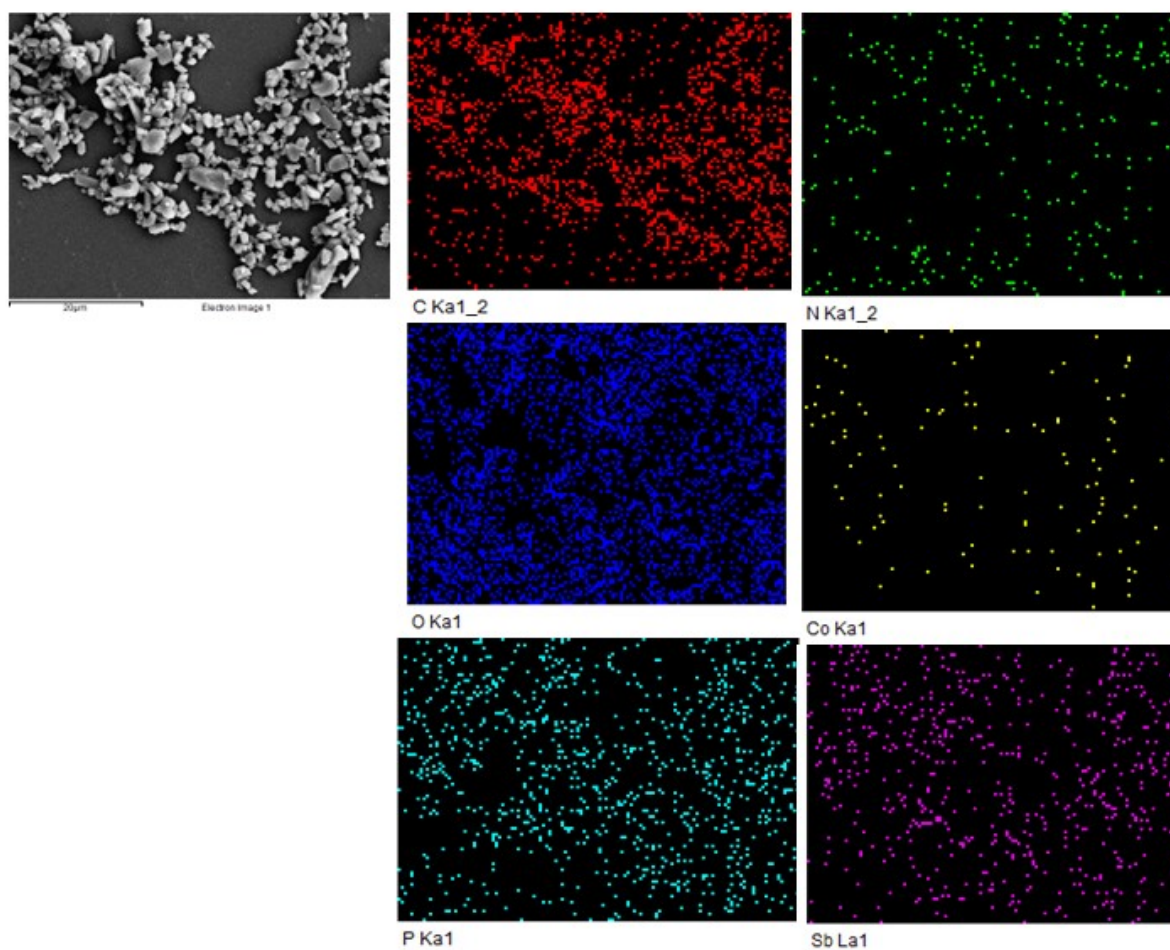

**Figure S19:** Elemental mapping of compound **3**.

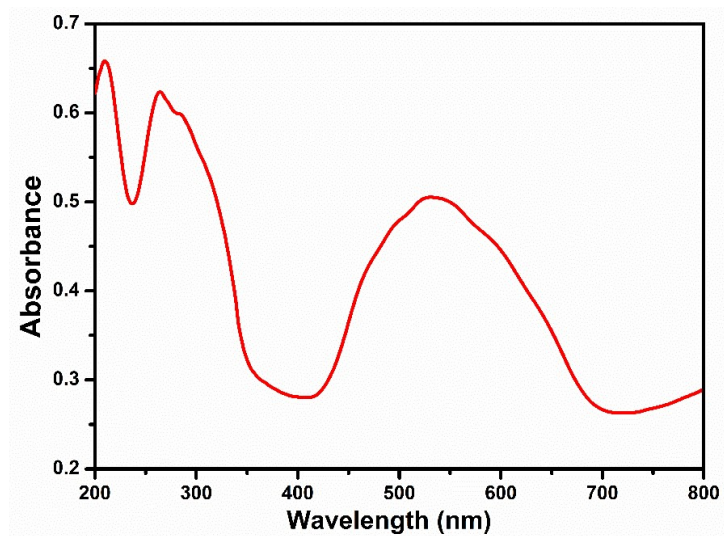

Figure S20: Solid-state UV-vis absorption spectrum of compound 3.

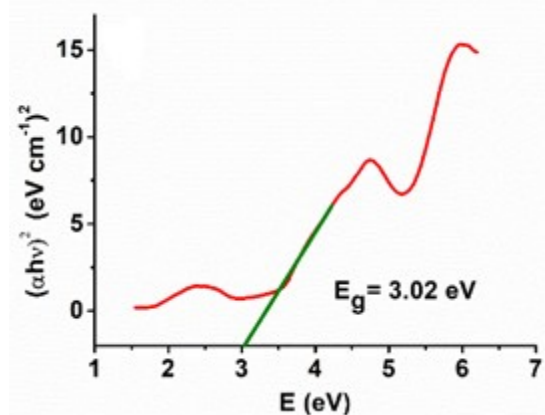

(a) Direct bandgap

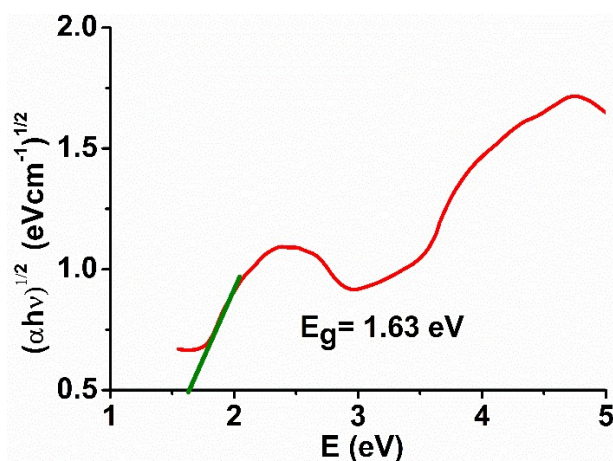

(b) Indirect bandgap

Figure S21: Tauc plot of compound 3.

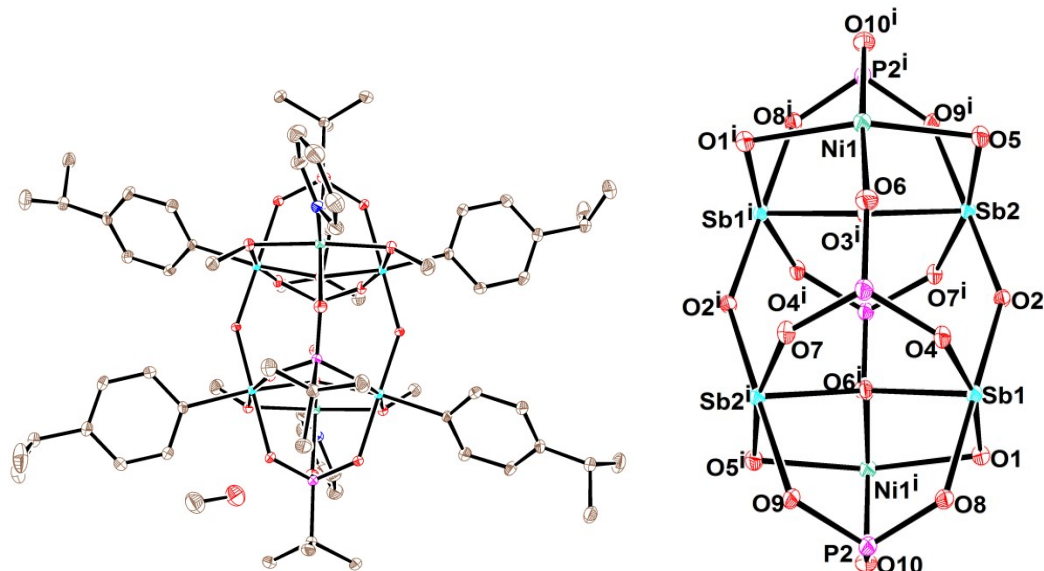

**Figure S22:** ORTEP view of **4** with thermal ellipsoids shown at 30% probability.

**Table S8:** Selected bond lengths (Å) and bond angles (deg) parameters of compound **4**.

|                      |          |                                      |            |                          |            |
|----------------------|----------|--------------------------------------|------------|--------------------------|------------|
| Sb2-O2               | 1.926(2) | O2-Sb2-O7 <sup>1</sup>               | 91.03(11)  | O6-Ni1-O1 <sup>1</sup>   | 96.73(10)  |
| Sb2-O9 <sup>1</sup>  | 2.053(2) | O31-Sb2-O91                          | 86.24(9)   | O6-Ni1-O10 <sup>1</sup>  | 174.90(10) |
| Sb2-O3 <sup>1</sup>  | 1.974(2) | O3 <sup>1</sup> -Sb2-O5              | 79.18(10)  | O6-Ni1-N1                | 89.03(11)  |
| Sb2-O5               | 2.025(3) | O31-Sb2-O7 <sup>1</sup>              | 89.84(10)  | N1-Ni1-O3 <sup>1</sup>   | 177.87(11) |
| Sb2-O7 <sup>1</sup>  | 2.003(2) | O5-Sb2-O9 <sup>1</sup>               | 87.87(10)  | N1-Ni1-O5                | 106.82(11) |
| Sb1-O2               | 1.921(2) | O7 <sup>1</sup> -Sb2-O9 <sup>1</sup> | 87.65(10)  | N1-Ni1-O1 <sup>1</sup>   | 102.33(11) |
| Sb1-O3               | 1.972(2) | O7 <sup>1</sup> -Sb2-O5              | 168.39(10) | N1-Ni1-O10 <sup>1</sup>  | 87.08(12)  |
| Sb1-O4               | 2.010(2) | O2-Sb1-O3                            | 94.72(10)  | O7-P1-O4                 | 110.50(14) |
| Sb1-O1               | 2.039(3) | O2-Sb1-O4                            | 91.57(10)  | O6-P1-O4                 | 113.70(14) |
| Sb1-O8               | 2.050(2) | O2-Sb1-O1                            | 95.00(11)  | O6-P1-O7                 | 113.15(14) |
| Ni1-O3 <sup>1</sup>  | 2.076(3) | O2-Sb1-O8                            | 177.23(11) | O8-P2-O9                 | 109.56(14) |
| Ni1-O5               | 2.100(3) | O3-Sb1-O4                            | 90.21(10)  | O10-P2-O9                | 111.51(15) |
| Ni1-O1 <sup>1</sup>  | 2.090(2) | O3-Sb1-O1                            | 78.98(10)  | O10-P2-O8                | 112.00(15) |
| Ni1-O10 <sup>1</sup> | 2.076(3) | O3-Sb1-O8                            | 86.72(10)  | Sb1-O2-Sb2               | 146.83(13) |
| Ni1-O6               | 2.002(2) | O4-Sb1-O1                            | 167.76(10) | P2-O9-Sb2 <sup>1</sup>   | 123.17(14) |
| Ni1-N1               | 2.069(3) | O4-Sb1-O8                            | 86.06(10)  | Sb21-O3-Ni1 <sup>1</sup> | 103.27(10) |
| P1-O4                | 1.555(3) | O1-Sb1-O8                            | 87.59(10)  | Sb1-O3-Sb2 <sup>1</sup>  | 138.56(13) |
| P1-O7                | 1.549(2) | O3 <sup>1</sup> -Ni1-O5              | 75.24(9)   | Sb1-O3-Ni1 <sup>1</sup>  | 103.00(10) |

|                        |            |                                       |            |                         |            |
|------------------------|------------|---------------------------------------|------------|-------------------------|------------|
| P1-O6                  | 1.491(3)   | O3 <sup>1</sup> -Ni1-O1 <sup>1</sup>  | 75.54(9)   | P1-O4-Sb1               | 136.55(15) |
| P2-O9                  | 1.558(2)   | O3 <sup>1</sup> -Ni1-O10 <sup>1</sup> | 92.63(10)  | Sb2-O5-Ni1              | 100.64(10) |
| P2-O8                  | 1.547(3)   | O1 <sup>1</sup> -Ni1-O5               | 148.87(10) | Sb1-O1-Ni1 <sup>1</sup> | 100.23(11) |
| P2-O10                 | 1.505(3)   | O10 <sup>1</sup> -Ni1-O5              | 83.52(10)  | P2-O8-Sb1               | 123.60(14) |
| O2-Sb2-O9 <sup>1</sup> | 178.68(11) | O10 <sup>1</sup> -Ni1-O1 <sup>1</sup> | 87.32(10)  | P1-O7-Sb2 <sup>1</sup>  | 138.10(15) |
| O2-Sb2-O3 <sup>1</sup> | 93.78(10)  | O6-Ni1-O3 <sup>1</sup>                | 91.39(10)  | P2-O10-Ni1 <sup>1</sup> | 115.46(15) |
| O2-Sb2-O5              | 93.44(10)  | O6-Ni1-O5                             | 94.47(10)  | P1-O6-Ni1               | 145.11(17) |

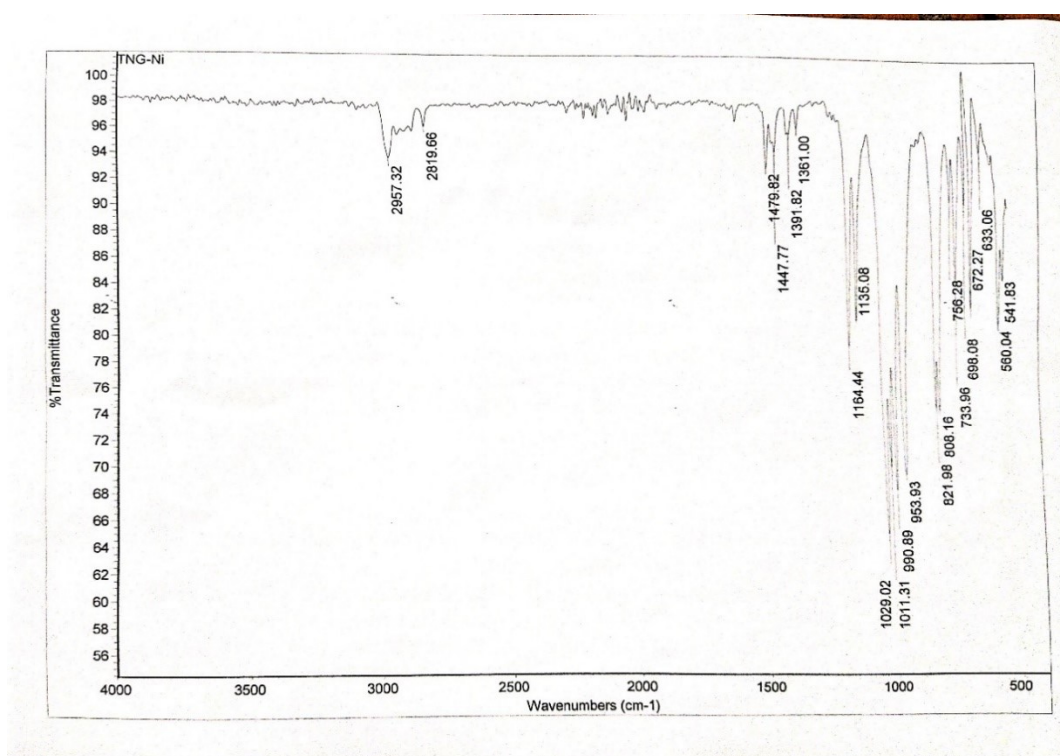

**Figure S23:** IR spectrum of compound 4.

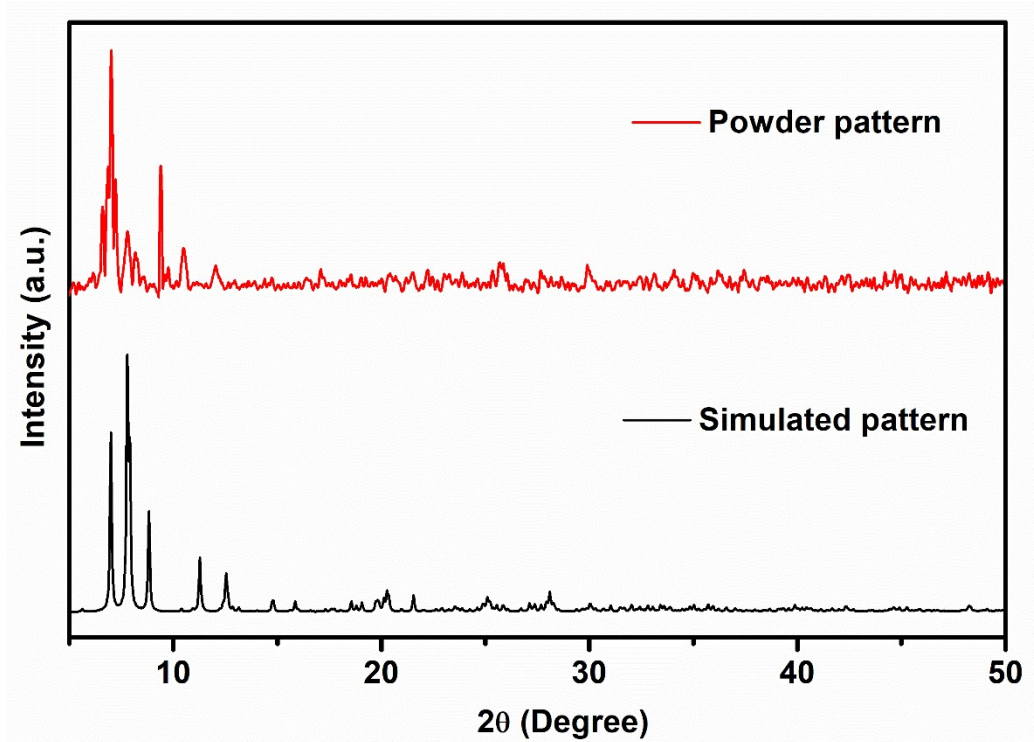

**Figure S24:** Powder X-ray diffraction pattern of a bulk sample of **4** compared to the simulated powder pattern extracted from single-crystal diffraction data.

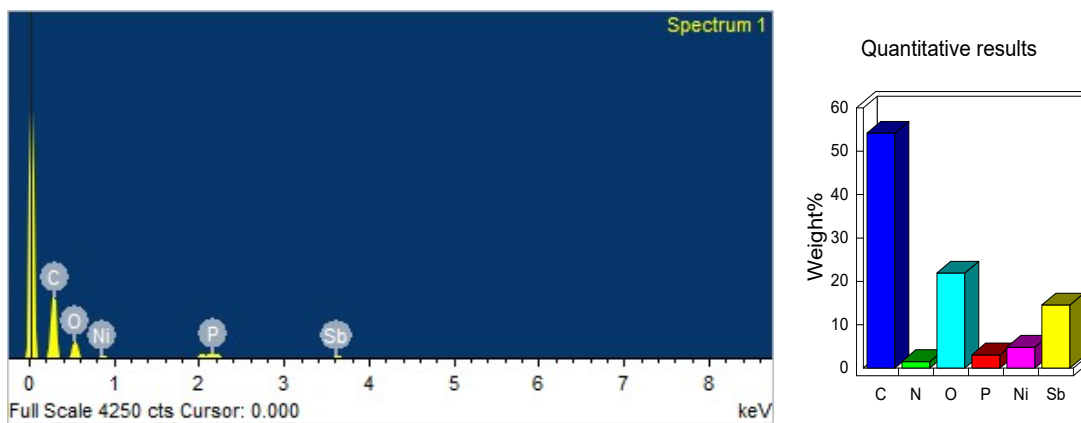

**Figure S25:** EDAX spectrum of compound **4**.

**Table S9:** EDAX analysis of 4.

| Element | Calculated weight% | Measured weight% from EDAX analysis |
|---------|--------------------|-------------------------------------|
| C       | 40.20              | 43.92                               |
| N       | 1.42               | 1.79                                |
| O       | 16.23              | 18.47                               |
| P       | 6.28               | 6.56                                |
| Ni      | 5.95               | 7.34                                |
| Sb      | 24.70              | 21.92                               |
| H       | 5.21               | Not detected                        |

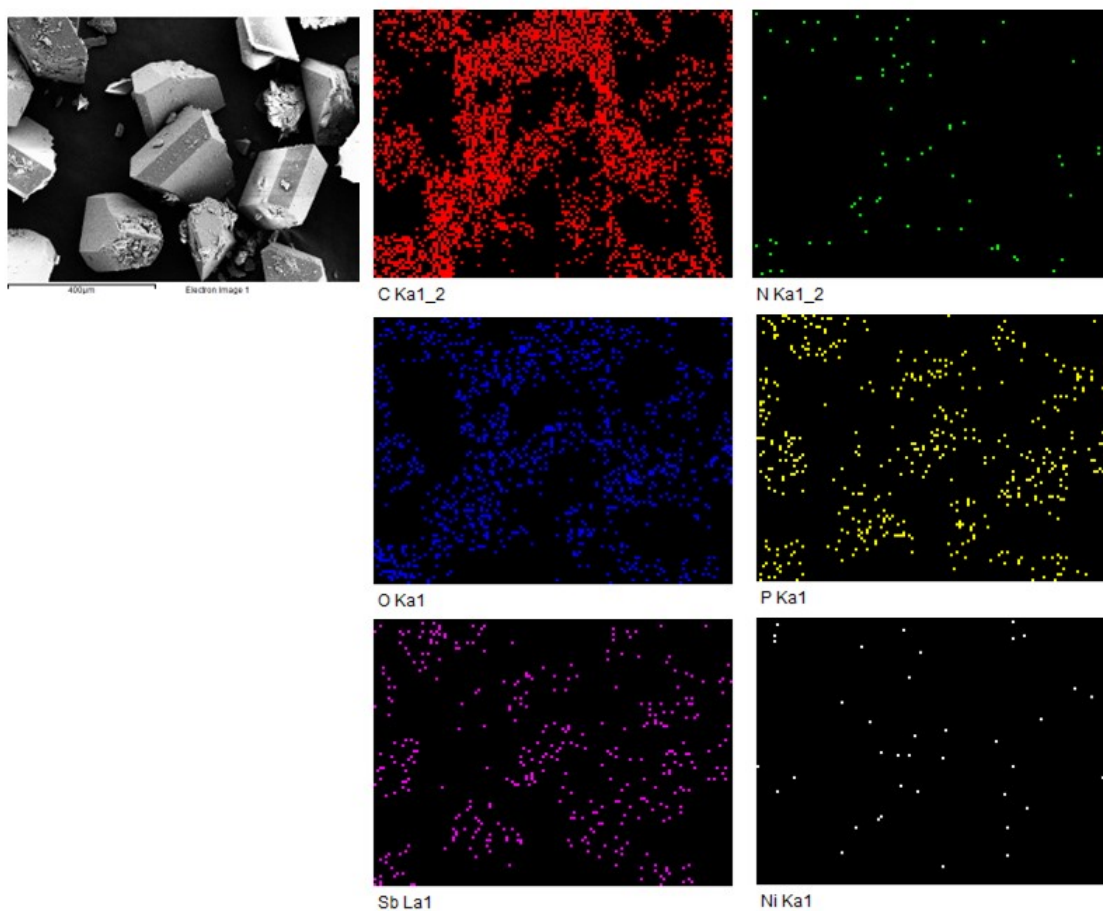

**Figure S26:** Elemental mapping of compound 4.



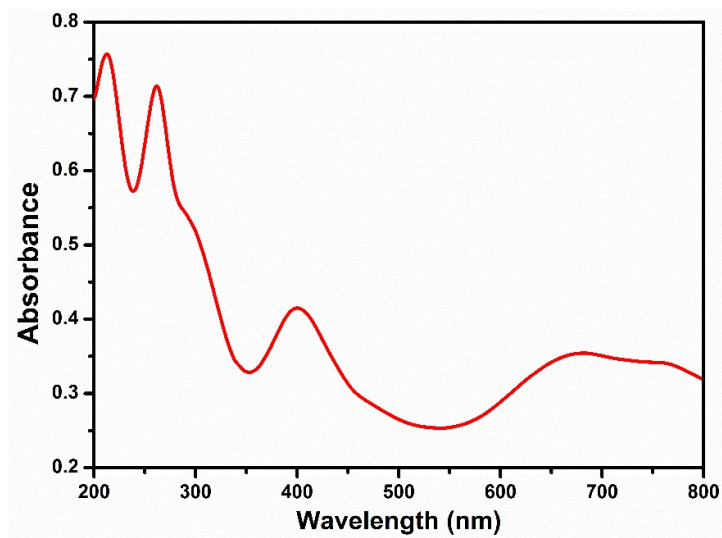

Figure S27: Solid-state UV-vis absorption spectrum of compound 4.

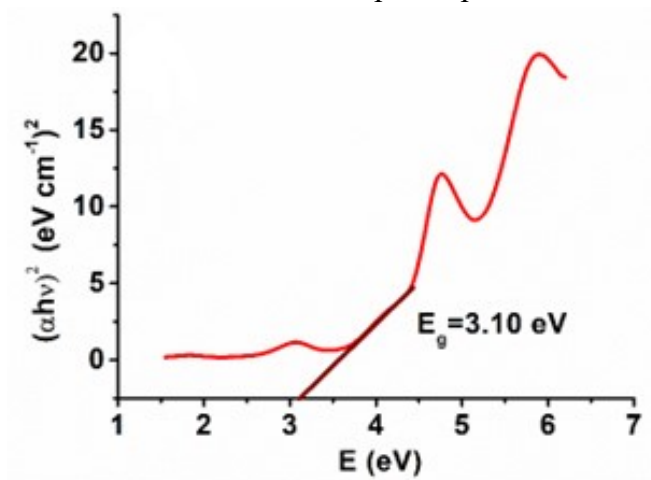

(a) Direct bandgap

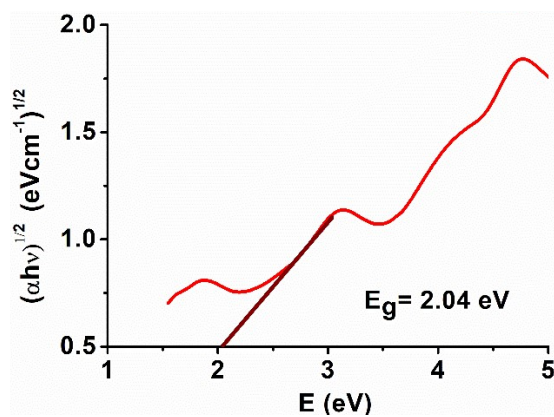

(b) Indirect bandgap

Figure S28: Tauc plot of compound 4.

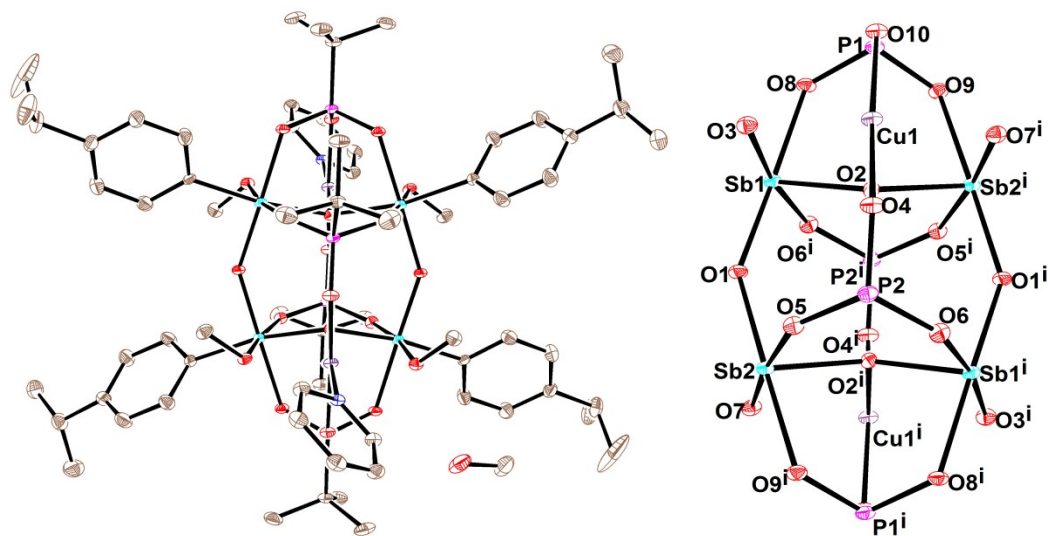

**Figure S29:** ORTEP view of **5** with thermal ellipsoids shown at 30% probability.

**Table S10:** Selected bond lengths (Å) and bond angles (deg) parameters of compound **5**.

|                     |            |                                      |           |                          |            |
|---------------------|------------|--------------------------------------|-----------|--------------------------|------------|
| Sb1-O2              | 2.0074(19) | O3-Sb1-O8                            | 84.55(8)  | O4-Cu1-O3                | 99.63(8)   |
| Sb1-O3              | 2.015(2)   | O3-Sb1-O6 <sup>1</sup>               | 171.53(8) | O4-Cu1-O7 <sup>1</sup>   | 94.91(8)   |
| Sb1-O1              | 1.915(2)   | O1-Sb1-O2                            | 94.80(8)  | O4-Cu1-O10               | 175.12(8)  |
| Sb1-O8              | 2.046(2)   | O1-Sb1-O3                            | 93.10(9)  | O4-Cu1-N1                | 88.70(10)  |
| Sb1-O6 <sup>1</sup> | 2.016(2)   | O1-Sb1-O8                            | 177.63(9) | N1-Cu1-O2                | 176.02(9)  |
| Sb2-O2 <sup>1</sup> | 2.013(2)   | O1-Sb1-O6 <sup>1</sup>               | 93.03(9)  | N1-Cu1-O3                | 101.78(9)  |
| Sb2-O9 <sup>1</sup> | 2.043(2)   | O6 <sup>1</sup> -Sb1-O8              | 89.34(9)  | N1-Cu1-O7 <sup>1</sup>   | 109.94(9)  |
| Sb2-O1              | 1.926(2)   | O2 <sup>1</sup> -Sb2-O9 <sup>1</sup> | 84.21(8)  | O8-P1-O9                 | 109.15(12) |
| Sb2-O7              | 1.998(2)   | O1-Sb2-O2 <sup>1</sup>               | 95.64(8)  | O10-P1-O9                | 112.38(12) |
| Sb2-O5              | 2.011(2)   | O1-Sb2-O9 <sup>1</sup>               | 177.85(8) | O10-P1-O8                | 112.13(12) |
| Cu1-O2              | 2.076(2)   | O1-Sb2-O7                            | 92.71(8)  | O5-P2-O6                 | 110.10(12) |
| Cu1-O3              | 2.348(2)   | O1-Sb2-O5                            | 88.92(9)  | O4-P2-O5                 | 113.52(12) |
| Cu1-O7 <sup>1</sup> | 2.326(2)   | O7-Sb2-O2 <sup>1</sup>               | 82.51(8)  | O4-P2-O6                 | 113.14(13) |
| Cu1-O10             | 1.985(2)   | O7-Sb2-O9 <sup>1</sup>               | 89.39(8)  | Sb1-O2-Sb2 <sup>1</sup>  | 136.38(10) |
| Cu1-O4              | 1.940(2)   | O7-Sb2-O5                            | 173.52(8) | Sb1-O2-Cu1               | 105.12(9)  |
| Cu1-N1              | 2.004(3)   | O5-Sb2-O2 <sup>1</sup>               | 91.09(8)  | Sb2 <sup>1</sup> -O2-Cu1 | 105.06(8)  |
| P1-O9               | 1.549(2)   | O5-Sb2-O9 <sup>1</sup>               | 88.94(8)  | P1-O9-Sb2 <sup>1</sup>   | 123.54(12) |
| P1-O8               | 1.547(2)   | O2-Cu1-O3                            | 74.34(7)  | Sb1-O3-Cu1               | 95.71(8)   |
| P1-O10              | 1.509(2)   | O2-Cu1-O7 <sup>1</sup>               | 73.60(7)  | Sb1-O1-Sb2               | 145.46(12) |
| P2-O5               | 1.543(2)   | O7 <sup>1</sup> -Cu1-O3              | 145.29(7) | P1-O8-Sb1                | 123.23(12) |
| P2-O4               | 1.506(2)   | O10-Cu1-O2                           | 91.20(8)  | Sb2-O7-Cu1 <sup>1</sup>  | 96.99(8)   |
| P2-O6               | 1.543(2)   | O10-Cu1-O3                           | 84.12(8)  | P2-O5-Sb2                | 138.77(13) |

|                        |          |                         |           |                        |            |
|------------------------|----------|-------------------------|-----------|------------------------|------------|
| O2-Sb1-O3              | 83.63(8) | O10-Cu1-O7 <sup>1</sup> | 83.58(8)  | P1-O10-Cu1             | 118.23(12) |
| O2-Sb1-O8              | 85.30(8) | O10-Cu1-N1              | 87.46(10) | P2-O4-Cu1              | 143.44(13) |
| O2-Sb1-O6 <sup>1</sup> | 90.04(8) | O4-Cu1-O2               | 92.82(8)  | P2-O6-Sb1 <sup>1</sup> | 139.86(13) |

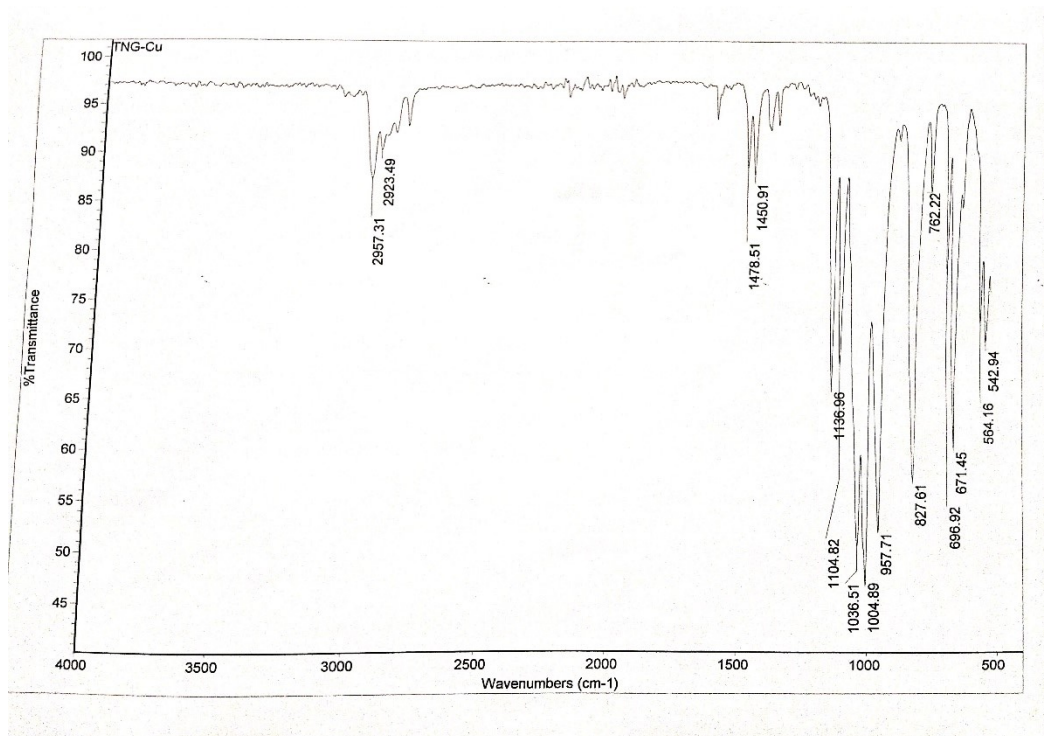

**Figure S30:** IR spectrum of compound 5.

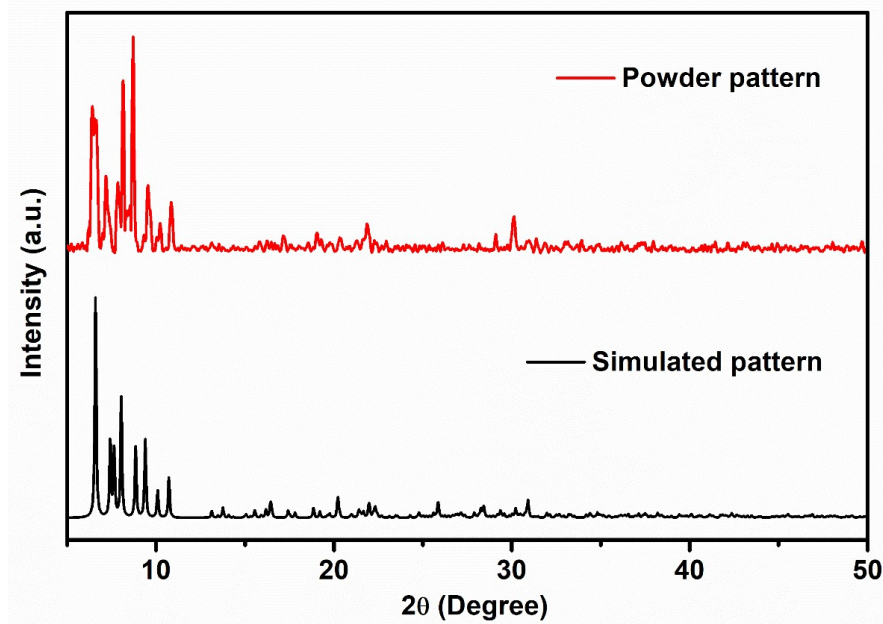

**Figure S31:** Powder X-ray diffraction pattern of a bulk sample of **5** compared to the simulated powder pattern extracted from single-crystal diffraction data.

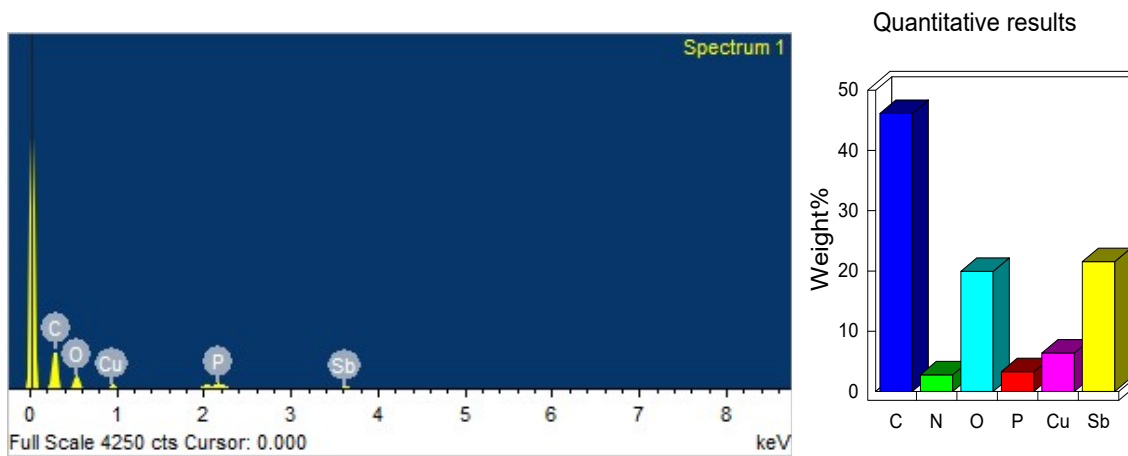

**Figure S32:** EDAX spectrum of compound **5**.

**Table S11:** EDAX analysis of **5**.

| Element | Calculated weight% | Measured weight% from EDAX analysis |
|---------|--------------------|-------------------------------------|
| C       | 40.01              | 41.54                               |
| N       | 1.41               | 1.98                                |
| O       | 16.15              | 18.86                               |
| P       | 6.25               | 6.89                                |
| Cu      | 6.41               | 7.77                                |
| Sb      | 24.58              | 22.97                               |
| H       | 5.19               | Not detected                        |

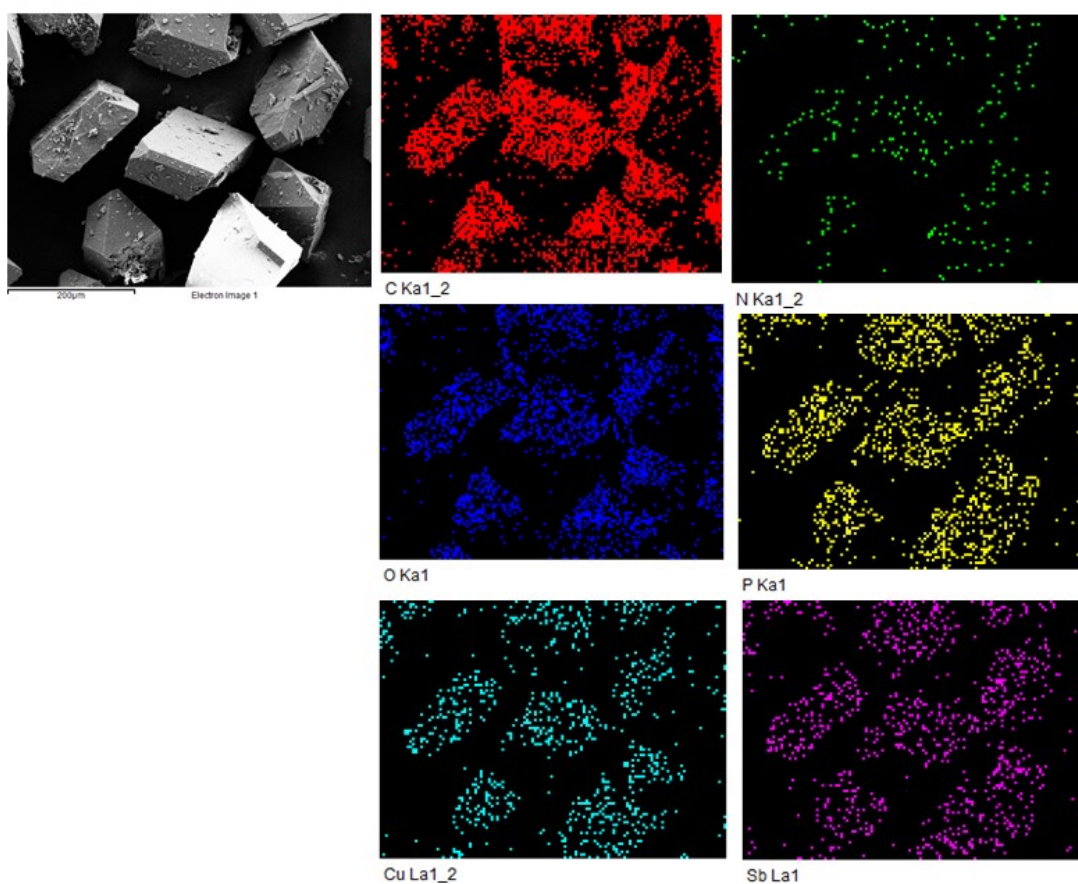

**Figure S33:** Elemental mapping of compound **5**.

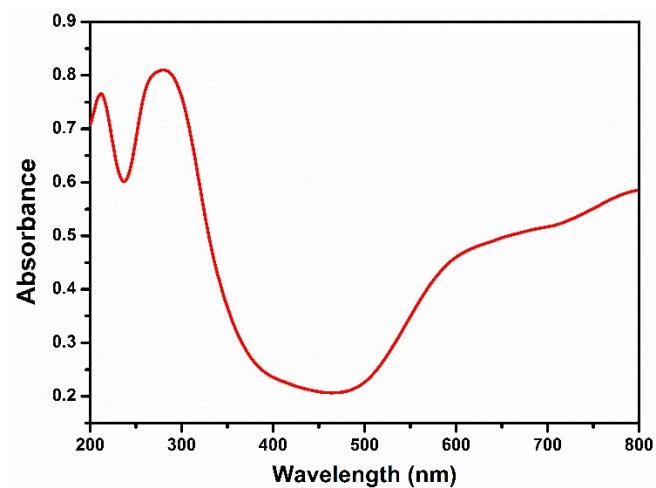

Figure S34: Solid-state UV-vis absorption spectrum of compound 5.

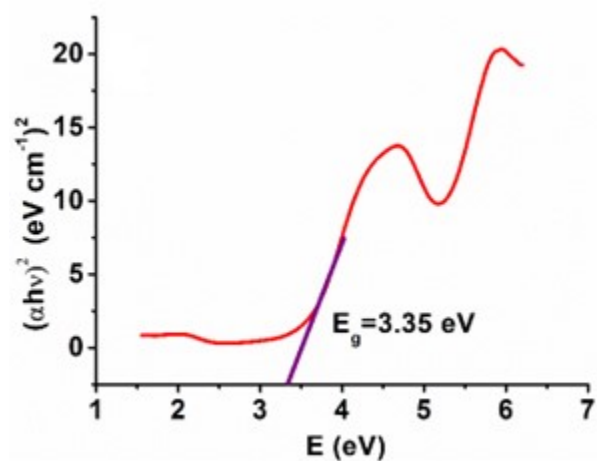

(a) Direct bandgap

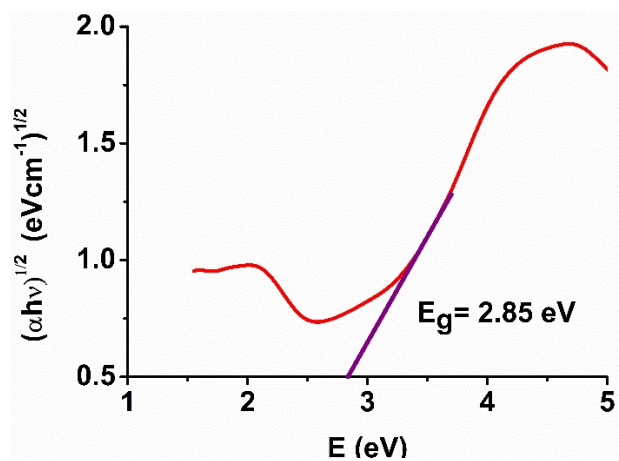

(b) Indirect bandgap

Figure S35: Tauc plot of compound 5.

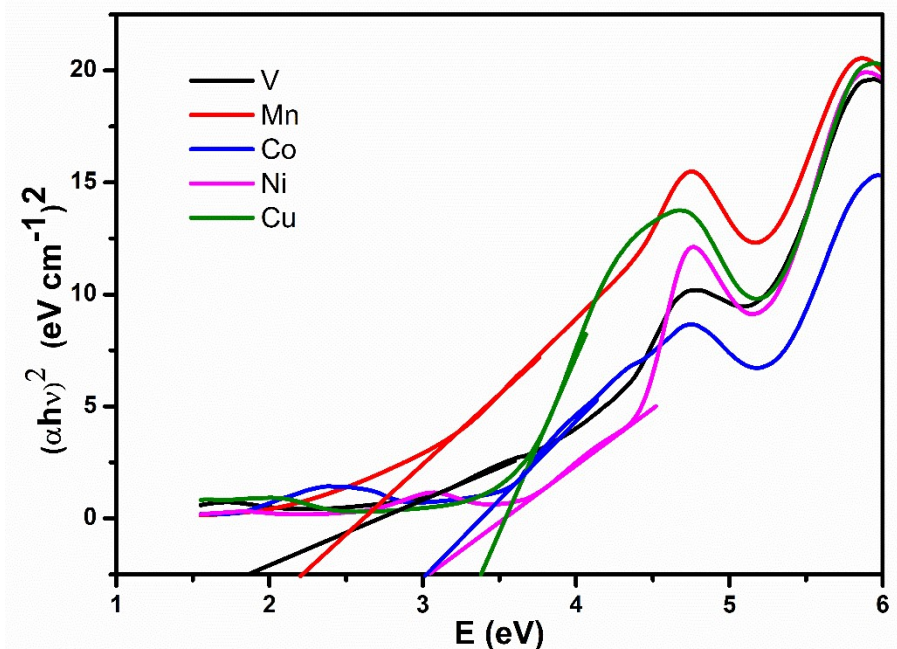

**Figure S36:** Tauc plots of compounds **1-5** (combined spectra). The direct bandgap ( $E_g$ ) values are 1.83 eV for **1**, 2.25 eV for **2**, 3.02 eV for **3**, 3.10 eV for **4**, and 3.35 eV for **5**.

**Table S12:** Shape calculation of compounds **1-5**.

**a)** Summary of SHAPE analysis for compounds **1-5** around metal ions:

| S.No     | Geometry                            | CShM value for V1 | CShM value for Mn1 | CShM value for Co1 | CShM value for Ni1 | CShM value for Cu1 |
|----------|-------------------------------------|-------------------|--------------------|--------------------|--------------------|--------------------|
| <b>1</b> | Hexagon (D6h)                       | 34.395            | 34.710             | 34.342             | 33.692             | 34.010             |
| <b>2</b> | Pentagonal pyramid (C5v)            | 23.097            | 21.247             | 21.876             | 22.046             | 22.472             |
| <b>3</b> | <b>Octahedron (Oh)</b>              | <b>2.070</b>      | <b>2.993</b>       | <b>2.317</b>       | <b>1.988</b>       | <b>3.043</b>       |
| <b>4</b> | Trigonal prism (D3h)                | 12.110            | 11.258             | 11.348             | 11.167             | 10.521             |
| <b>5</b> | Johnson pentagonal pyramid J2 (C5v) | 27.043            | 25.050             | 25.80              | 25.994             | 26.240             |

**b)** Summary of SHAPE analysis for Sb1 in compound **1-5**:

| S.No     | Geometry      | CShM value for Sb1 in 1 | CShM value for Sb1 in 2 | CShM value for Sb1 in 3 | CShM value for Sb1 in 4 | CShM value for Sb1 in 4 |
|----------|---------------|-------------------------|-------------------------|-------------------------|-------------------------|-------------------------|
| <b>1</b> | Hexagon (D6h) | 31.737                  | 32.292                  | 32.201                  | 31.871                  | 31.871                  |

|   |                                     |              |              |              |              |              |
|---|-------------------------------------|--------------|--------------|--------------|--------------|--------------|
| 2 | Pentagonal pyramid (C5v)            | 26.785       | 27.564       | 27.295       | 28.048       | 28.048       |
| 3 | <b>Octahedron (Oh)</b>              | <b>0.636</b> | <b>0.332</b> | <b>0.396</b> | <b>0.284</b> | <b>0.284</b> |
| 4 | Trigonal prism (D3h)                | 14.617       | 15.231       | 15.066       | 14.675       | 14.675       |
| 5 | Johnson pentagonal pyramid J2 (C5v) | 30.427       | 31.346       | 31.031       | 31.571       | 31.571       |

**Table S13:** Bond Valence Sum (BVS) calculations:

| Compound 1 |      |                          | Compound 2 |      |                          |
|------------|------|--------------------------|------------|------|--------------------------|
| Metal Site | BVS  | Assigned Oxidation state | Metal Site | BVS  | Assigned Oxidation state |
| V1         | 3.98 | 4                        | Mn1        | 1.97 | 2                        |

| Compound 3 |      |                          | Compound 4 |      |                          |
|------------|------|--------------------------|------------|------|--------------------------|
| Metal Site | BVS  | Assigned Oxidation state | Metal Site | BVS  | Assigned Oxidation state |
| Co1        | 2.03 | 2                        | Ni1        | 2.05 | 2                        |

| Compound 5 |      |                          |
|------------|------|--------------------------|
| Metal Site | BVS  | Assigned Oxidation state |
| Cu1        | 1.99 | 2                        |



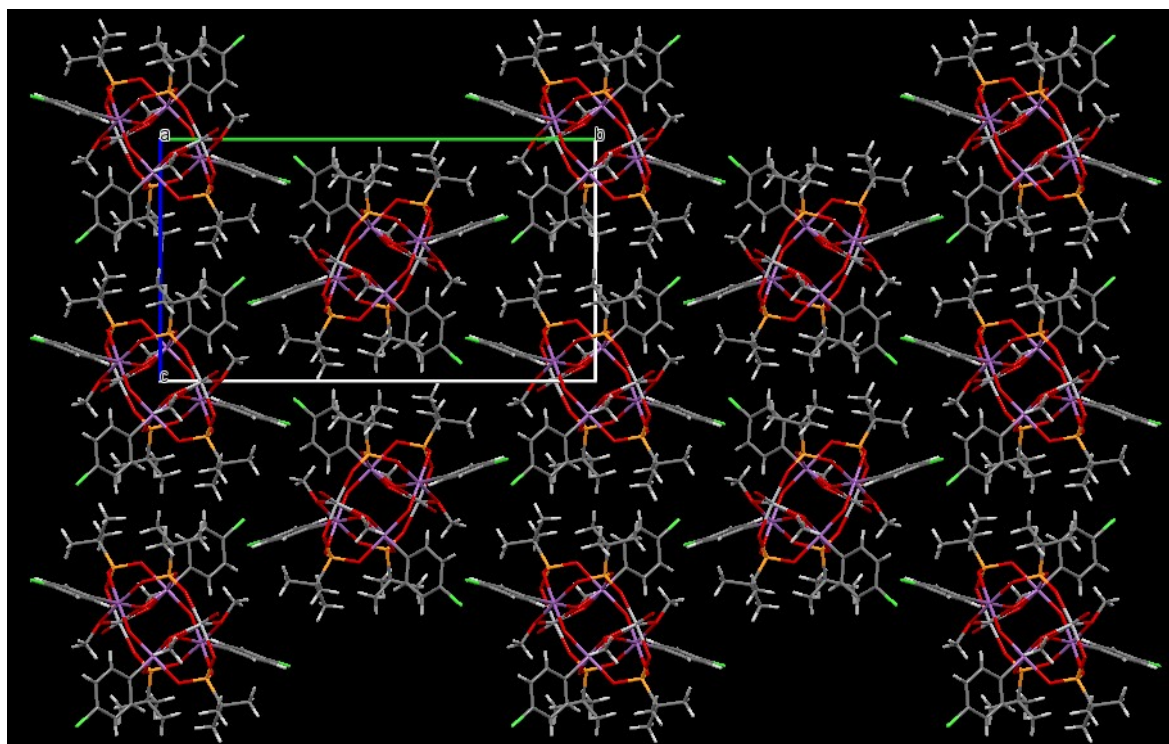

**Figure S37:** Packing diagram of compound **1** along a-axis

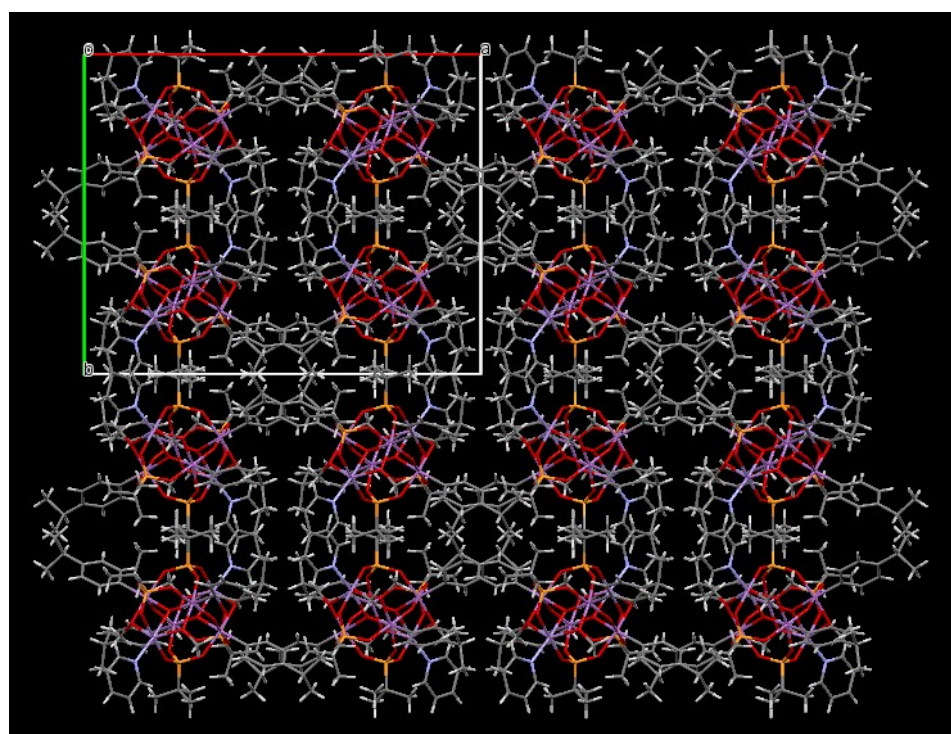

**Figure 38:** Packing diagram of compound **2** along the c-axis

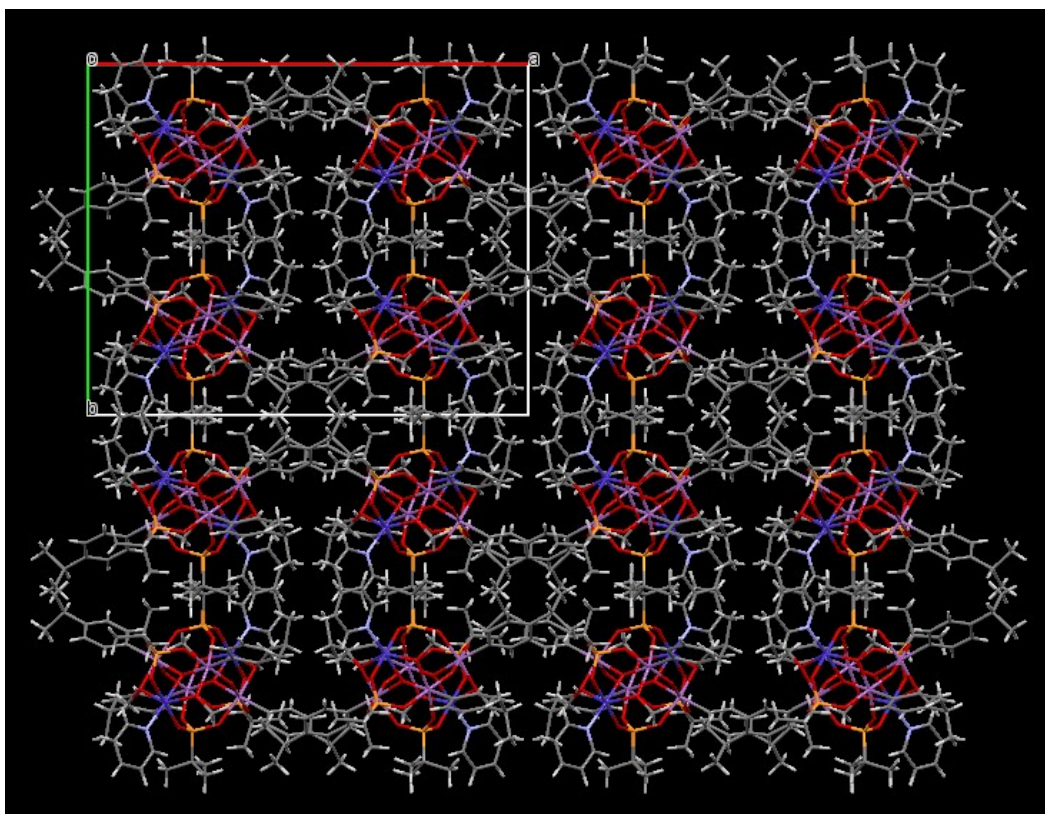

**Figure S39:** Packing diagram of compound **3** along the c-axis

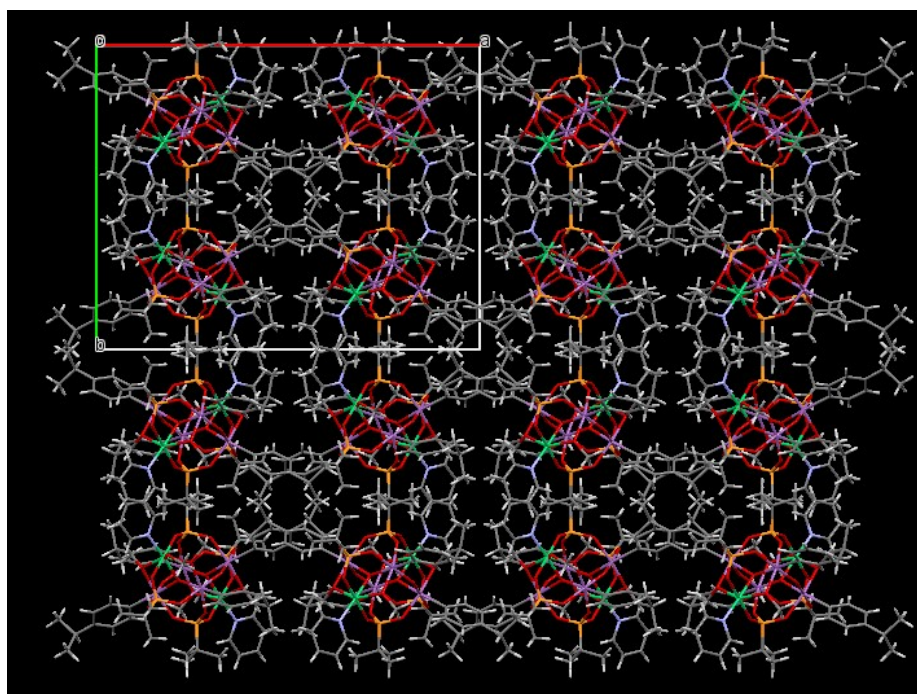

**Figure S40:** Packing diagram of compound **4** along the c-axis

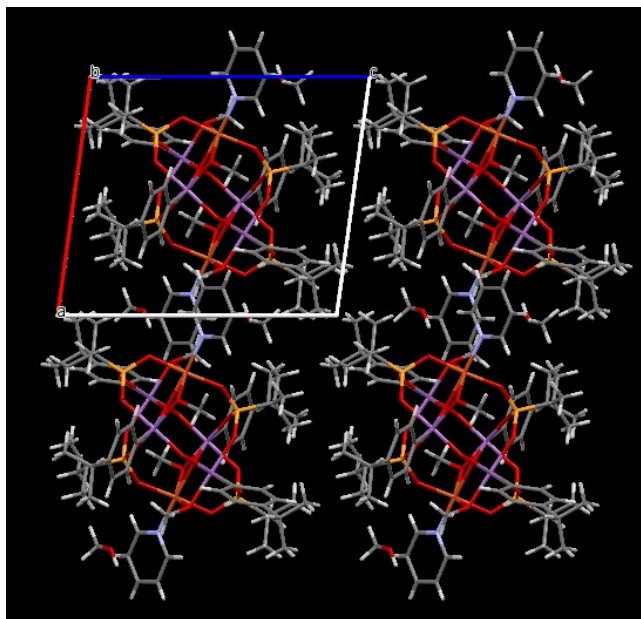

**Figure S41:** Packing diagram of compound **5** along b-axis

**Solvent treatment of compound 3:**

A solvent mask was calculated and 88 electrons were found in a volume of 740 Å<sup>3</sup> in 3 voids. This is consistent with the presence of 1[CH<sub>3</sub>OH] per formula unit, which account for 72.0 electrons.
